# Supplementary material for: Hospital-based Health Technology Assessment of central dialysis fluid delivery system for hemodialysis patients
Source: Research Square preprint supplement (doi:10.21203/rs.3.rs-6389072/v1), 2025-05-08
Supplement: Supplementary file 1 [file 23cb0d5a73df4997b9c49ce5.xlsx]

## Sheet: Scenario 1
	Input parameters, changeable
	Calculation formula, not changeable
Analysis Plan	Scenario 1		Scenario 1	Scenario 2	Scenario 3
Number of CDDS/SPDDS devices	50		50	45	40	35	30	25	20	15	12	11	10	9	8	7	6	5	4	3	2	1
CDDS/SPDDS daily service volume (person-times)	100
	CDDS service volume per day (person-times)	SPDDS service volume per day (person-times)					CDDS service volume per day (person-times)	SPDDS service volume per day (person-times)					CDDS service volume per day (person-times)	SPDDS service volume per day (person-times)
daily service volume (person-times)	100	100					100	100					100	100
Cost Composition	CDDS single treatment cost	SPDDS single treatment cost	CDDS Single Treatment Cost Savings	Reduction		Cost Composition	CDDS cost per day of treatment	SPDDS cost per day of treatment	CDDS Cost Savings per day of treatmen	Reduction		Cost Composition	CDDS Cost per year of treatment	SPDDS Cost per year of treatment	CDDS Cost Savings per year of treatment	Reduction
Labor Cost	18.0489	37.8132	19.7643	0.522683		Labor Cost	1804.89	3781.32	1976.43	0.522683		Labor Cost	563125	1.17977e+06	616646	0.522683
Equipment Cost	58.1827	58.6378	0.455128	0.00776168		Equipment Cost	5818.27	5863.78	45.5128	0.00776168		Equipment Cost	1815300	1829500	14200	0.00776168
Consumable Cost	235.202	296.948	61.7459	0.207935		Consumable Cost	23520.2	29694.8	6174.59	0.207935		Consumable Cost	7.33832e+06	9.26479e+06	1.92647e+06	0.207935
Learning Cost	0.674926	2.00197	1.32705	0.662869		Learning Cost	67.4926	200.197	132.705	0.662869		Learning Cost	21057.7	62461.5	41403.8	0.662869
Misuse Cost	0.00530849	0.0213609	0.0160525	0.751486		Misuse Cost	0.530849	2.13609	1.60525	0.751486		Misuse Cost	165.625	666.462	500.837	0.751486
Storage space cost	0.0151154	0.0755769	0.0604615	0.8		Storage space cost	1.51154	7.55769	6.04615	0.8		Storage space cost	471.6	2358	1886.4	0.8
Total	312.129	395.498	83.3689	0.210794		Total	31212.9	39549.8	8336.89	0.210794		Total	9.73844e+06	1.23395e+07	2.60111e+06	0.210794
直接成本	311.434	393.399	81.9653	0.208351		直接成本	31143.4	39339.9	8196.53	0.208351		直接成本	9.71674e+06	1.22741e+07	2.55732e+06	0.208351
间接成本	0.69535	2.09891	1.40356	0.668709		间接成本	69.535	209.891	140.356	0.668709		间接成本	21694.9	65486	43791.1	0.668709
Scenario 1
5 devices	CDDS service volume per day (person-times)	SPDDS service volume per day (person-times)				5 devices	CDDS service volume per day (person-times)	SPDDS service volume per day (person-times)				5 devices	CDDS service volume per day (person-times)	SPDDS service volume per day (person-times)
daily service volume (person-times)	10	10		No cost savings		daily service volume (person-times)	10	10		No cost savings		daily service volume (person-times)	10	10		No cost savings
Cost Composition	CDDS single treatment cost	SPDDS single treatment cost	CDDS Single Treatment Cost Savings	Reduction		Cost Composition	CDDS cost per day of treatment	SPDDS cost per day of treatment	CDDS Cost Savings per day of treatmen	Reduction		Cost Composition	CDDS Cost per year of treatment	SPDDS Cost per year of treatment	CDDS Cost Savings per year of treatment	Reduction
Labor Cost	18.7099	37.8132	19.1032	0.5052		Labor Cost	187.099	378.132	191.032	0.5052		Labor Cost	58375	117977	59602.1	0.5052
Equipment Cost	134.712	58.6378	-76.0737	-1.29735		Equipment Cost	1347.12	586.378	-760.737	-1.29735		Equipment Cost	420300	182950	-237350	-1.29735
Consumable Cost	261.097	296.948	35.8512	0.120732		Consumable Cost	2610.97	2969.48	358.512	0.120732		Consumable Cost	814623	926479	111856	0.120732
Learning Cost	0.674926	2.00197	1.32705	0.662869		Learning Cost	6.74926	20.0197	13.2705	0.662869		Learning Cost	2105.77	6246.15	4140.38	0.662869
Misuse Cost	0.00530849	0.0213609	0.0160525	0.751486		Misuse Cost	0.0530849	0.213609	0.160525	0.751486		Misuse Cost	16.5625	66.6462	50.0837	0.751486
Storage space cost	0.151154	0.755769	0.604615	0.8		Storage space cost	1.51154	7.55769	6.04615	0.8		Storage space cost	471.6	2358	1886.4	0.8
Total	415.35	396.178	-19.1715	-0.0483912		Total	4153.5	3961.78	-191.715	-0.0483912		Total	1.29589e+06	1.23608e+06	-59815.2	-0.0483912
6 devices	CDDS service volume per day (person-times)	SPDDS service volume per day (person-times)				6 devices	CDDS service volume per day (person-times)	SPDDS service volume per day (person-times)				6 devices	CDDS service volume per day (person-times)	SPDDS service volume per day (person-times)
daily service volume (person-times)	12	12		Cost savings		daily service volume (person-times)	12	12		Cost savings		daily service volume (person-times)	12	12		Cost savings
Cost Composition	CDDS single treatment cost	SPDDS single treatment cost	CDDS Single Treatment Cost Savings	Reduction		Cost Composition	CDDS cost per day of treatment	SPDDS cost per day of treatment	CDDS Cost Savings per day of treatmen	Reduction		Cost Composition	CDDS Cost per year of treatment	SPDDS Cost per year of treatment	CDDS Cost Savings per year of treatment	Reduction
Labor Cost	18.5875	37.8132	19.2256	0.508438		Labor Cost	223.05	453.758	230.708	0.508438		Labor Cost	69591.7	141572	71980.8	0.508438
Equipment Cost	120.54	58.6378	-61.9017	-1.05566		Equipment Cost	1446.47	703.654	-742.821	-1.05566		Equipment Cost	451300	219540	-231760	-1.05566
Consumable Cost	255.928	296.948	41.0205	0.13814		Consumable Cost	3071.13	3563.38	492.246	0.13814		Consumable Cost	958194	1.11177e+06	153581	0.13814
Learning Cost	0.674926	2.00197	1.32705	0.662869		Learning Cost	8.09911	24.0237	15.9246	0.662869		Learning Cost	2526.92	7495.38	4968.46	0.662869
Misuse Cost	0.00530849	0.0213609	0.0160525	0.751486		Misuse Cost	0.0637019	0.256331	0.192629	0.751486		Misuse Cost	19.875	79.9754	60.1004	0.751486
Storage space cost	0.125962	0.629808	0.503846	0.8		Storage space cost	1.51154	7.55769	6.04615	0.8		Storage space cost	471.6	2358	1886.4	0.8
Total	395.861	396.052	0.191352	0.000483149		Total	4750.33	4752.63	2.29623	0.000483149		Total	1.4821e+06	1.48282e+06	716.424	0.000483149
7 devices	CDDS service volume per day (person-times)	SPDDS service volume per day (person-times)				7 devices	CDDS service volume per day (person-times)	SPDDS service volume per day (person-times)				7 devices	CDDS service volume per day (person-times)	SPDDS service volume per day (person-times)
daily service volume (person-times)	14	14		Cost savings		daily service volume (person-times)	14	14		Cost savings		daily service volume (person-times)	14	14		Cost savings
Cost Composition	CDDS single treatment cost	SPDDS single treatment cost	CDDS Single Treatment Cost Savings	Reduction		Cost Composition	CDDS cost per day of treatment	SPDDS cost per day of treatment	CDDS Cost Savings per day of treatmen	Reduction		Cost Composition	CDDS Cost per year of treatment	SPDDS Cost per year of treatment	CDDS Cost Savings per year of treatment	Reduction
Labor Cost	18.5001	37.8132	19.3131	0.51075		Labor Cost	259.001	529.384	270.383	0.51075		Labor Cost	80808.3	165168	84359.6	0.51075
Equipment Cost	110.417	58.6378	-51.7788	-0.883028		Equipment Cost	1545.83	820.929	-724.904	-0.883028		Equipment Cost	482300	256130	-226170	-0.883028
Consumable Cost	252.236	296.948	44.7128	0.150574		Consumable Cost	3531.3	4157.28	625.979	0.150574		Consumable Cost	1.10176e+06	1.29707e+06	195305	0.150574
Learning Cost	0.674926	2.00197	1.32705	0.662869		Learning Cost	9.44896	28.0276	18.5786	0.662869		Learning Cost	2948.08	8744.62	5796.54	0.662869
Misuse Cost	0.00530849	0.0213609	0.0160525	0.751486		Misuse Cost	0.0743189	0.299053	0.224734	0.751486		Misuse Cost	23.1875	93.3046	70.1171	0.751486
Storage space cost	0.107967	0.539835	0.431868	0.8		Storage space cost	1.51154	7.55769	6.04615	0.8		Storage space cost	471.6	2358	1886.4	0.8
Total	381.941	395.963	14.022	0.0354124		Total	5347.17	5543.48	196.308	0.0354124		Total	1.66832e+06	1.72956e+06	61248.1	0.0354124
直接成本	381.152	372.483	-8.66964	-0.0232753		直接成本	5336.13	5385.07	48.9404	0.00908816		直接成本	1.66487e+06	1.59061e+06	-74259.1	-0.0466858
间接成本	0.788202	2.56317	1.77497	0.692489		间接成本	11.0348	35.8844	24.8495	0.692489		间接成本	3442.86	11195.9	1956.52	0.174753
8 devices	CDDS service volume per day (person-times)	SPDDS service volume per day (person-times)				8 devices	CDDS service volume per day (person-times)	SPDDS service volume per day (person-times)				8 devices	CDDS service volume per day (person-times)	SPDDS service volume per day (person-times)
daily service volume (person-times)	16	16		Cost savings		daily service volume (person-times)	16	16		Cost savings		daily service volume (person-times)	16	16		Cost savings
Cost Composition	CDDS single treatment cost	SPDDS single treatment cost	CDDS Single Treatment Cost Savings	Reduction		Cost Composition	CDDS cost per day of treatment	SPDDS cost per day of treatment	CDDS Cost Savings per day of treatmen	Reduction		Cost Composition	CDDS Cost per year of treatment	SPDDS Cost per year of treatment	CDDS Cost Savings per year of treatment	Reduction
Labor Cost	18.4345	37.8132	19.3787	0.512485		Labor Cost	294.952	605.011	310.059	0.512485		Labor Cost	92025	188763	96738.3	0.512485
Equipment Cost	102.825	58.6378	-44.1867	-0.753553		Equipment Cost	1645.19	938.205	-706.987	-0.753553		Equipment Cost	513300	292720	-220580	-0.753553
Consumable Cost	249.466	296.948	47.482	0.1599		Consumable Cost	3991.46	4751.17	759.712	0.1599		Consumable Cost	1.24534e+06	1.48237e+06	237030	0.1599
Learning Cost	0.674926	2.00197	1.32705	0.662869		Learning Cost	10.7988	32.0316	21.2327	0.662869		Learning Cost	3369.23	9993.85	6624.62	0.662869
Misuse Cost	0.00530849	0.0213609	0.0160525	0.751486		Misuse Cost	0.0849359	0.341775	0.256839	0.751486		Misuse Cost	26.5	106.634	80.1338	0.751486
Storage space cost	0.0944712	0.472356	0.377885	0.8		Storage space cost	1.51154	7.55769	6.04615	0.8		Storage space cost	471.6	2358	1886.4	0.8
Total	371.5	395.895	24.395	0.0616198		Total	5944	6334.32	390.32	0.0616198		Total	1.85453e+06	1.97631e+06	121780	0.0616198
直接成本	356.261	358.337	2.07622	0.00579404		直接成本	7125.21	7410.04	284.832	0.0384386		直接成本	2.22307e+06	2.18404e+06	-39030.3	-0.0178707
间接成本	0.755811	2.40122	1.64541	0.685238		间接成本	15.1162	48.0244	32.9081	0.685238		间接成本	4716.26	14983.6	1986.57	0.132583
9 devices	CDDS service volume per day (person-times)	SPDDS service volume per day (person-times)				9 devices	CDDS service volume per day (person-times)	SPDDS service volume per day (person-times)				9 devices	CDDS service volume per day (person-times)	SPDDS service volume per day (person-times)
daily service volume (person-times)	18	18		Cost savings		daily service volume (person-times)	18	18		Cost savings		daily service volume (person-times)	18	18		Cost savings
Cost Composition	CDDS single treatment cost	SPDDS single treatment cost	CDDS Single Treatment Cost Savings	Reduction		Cost Composition	CDDS cost per day of treatment	SPDDS cost per day of treatment	CDDS Cost Savings per day of treatmen	Reduction		Cost Composition	CDDS Cost per year of treatment	SPDDS Cost per year of treatment	CDDS Cost Savings per year of treatment	Reduction
Labor Cost	18.3835	37.8132	19.4297	0.513834		Labor Cost	330.903	680.637	349.734	0.513834		Labor Cost	103242	212359	109117	0.513834
Equipment Cost	96.9195	58.6378	-38.2817	-0.65285		Equipment Cost	1744.55	1055.48	-689.071	-0.65285		Equipment Cost	544300	329310	-214990	-0.65285
Consumable Cost	247.312	296.948	49.6359	0.167153		Consumable Cost	4451.62	5345.07	893.446	0.167153		Consumable Cost	1.38891e+06	1.66766e+06	278755	0.167153
Learning Cost	0.674926	2.00197	1.32705	0.662869		Learning Cost	12.1487	36.0355	23.8868	0.662869		Learning Cost	3790.38	11243.1	7452.69	0.662869
Misuse Cost	0.00530849	0.0213609	0.0160525	0.751486		Misuse Cost	0.0955529	0.384497	0.288944	0.751486		Misuse Cost	29.8125	119.963	90.1506	0.751486
Storage space cost	0.0839744	0.419872	0.335897	0.8		Storage space cost	1.51154	7.55769	6.04615	0.8		Storage space cost	471.6	2358	1886.4	0.8
Total	363.38	395.843	32.4628	0.0820095		Total	6540.83	7125.17	584.331	0.0820095		Total	2.04074e+06	2.22305e+06	182311	0.0820095
直接成本	350.952	358.337	7.38449	0.0206077		直接成本	7720.95	8151.05	430.097	0.0527659		直接成本	2.40894e+06	2.40244e+06	-6497.32	-0.00270447
间接成本	0.748941	2.36686	1.61792	0.683573		间接成本	16.4767	52.071	35.5943	0.683573		间接成本	5140.73	16246.2	1996.58	0.122896
10 devices	CDDS service volume per day (person-times)	SPDDS service volume per day (person-times)				10 devices	CDDS service volume per day (person-times)	SPDDS service volume per day (person-times)				10 devices	CDDS service volume per day (person-times)	SPDDS service volume per day (person-times)
daily service volume (person-times)	20	20		Cost savings		daily service volume (person-times)	20	20		Cost savings		daily service volume (person-times)	20	20		Cost savings
Cost Composition	CDDS single treatment cost	SPDDS single treatment cost	CDDS Single Treatment Cost Savings	Reduction		Cost Composition	CDDS cost per day of treatment	SPDDS cost per day of treatment	CDDS Cost Savings per day of treatmen	Reduction		Cost Composition	CDDS Cost per year of treatment	SPDDS Cost per year of treatment	CDDS Cost Savings per year of treatment	Reduction
Labor Cost	18.3427	37.8132	19.4705	0.514913		Labor Cost	366.854	756.263	389.41	0.514913		Labor Cost	114458	235954	121496	0.514913
Equipment Cost	92.1955	58.6378	-33.5577	-0.572288		Equipment Cost	1843.91	1172.76	-671.154	-0.572288		Equipment Cost	575300	365900	-209400	-0.572288
Consumable Cost	245.589	296.948	51.3589	0.172956		Consumable Cost	4911.79	5938.97	1027.18	0.172956		Consumable Cost	1.53248e+06	1.85296e+06	320480	0.172956
Learning Cost	0.674926	2.00197	1.32705	0.662869		Learning Cost	13.4985	40.0394	26.5409	0.662869		Learning Cost	4211.54	12492.3	8280.77	0.662869
Misuse Cost	0.00530849	0.0213609	0.0160525	0.751486		Misuse Cost	0.10617	0.427219	0.321049	0.751486		Misuse Cost	33.125	133.292	100.167	0.751486
Storage space cost	0.0755769	0.377885	0.302308	0.8		Storage space cost	1.51154	7.55769	6.04615	0.8		Storage space cost	471.6	2358	1886.4	0.8
Total	356.883	395.801	38.9171	0.0983251		Total	7137.67	7916.01	778.343	0.0983251		Total	2.22695e+06	2.4698e+06	242843	0.0983251
直接成本	356.128	393.399	37.2717	0.0947427		直接成本	7122.55	7867.99	745.435	0.0947427		直接成本	2.22224e+06	2.45481e+06	232576	0.0947427
间接成本	0.755811	2.40122	1.64541	0.685238		间接成本	15.1162	48.0244	32.9081	0.685238		间接成本	4716.26	14983.6	10267.3	0.685238
11 devices	CDDS service volume per day (person-times)	SPDDS service volume per day (person-times)				11 devices	CDDS service volume per day (person-times)	SPDDS service volume per day (person-times)				11 devices	CDDS service volume per day (person-times)	SPDDS service volume per day (person-times)
daily service volume (person-times)	22	22		Cost savings		daily service volume (person-times)	22	22		Cost savings		daily service volume (person-times)	22	22		Cost savings
Cost Composition	CDDS single treatment cost	SPDDS single treatment cost	CDDS Single Treatment Cost Savings	Reduction		Cost Composition	CDDS cost per day of treatment	SPDDS cost per day of treatment	CDDS Cost Savings per day of treatmen	Reduction		Cost Composition	CDDS Cost per year of treatment	SPDDS Cost per year of treatment	CDDS Cost Savings per year of treatment	Reduction
Labor Cost	18.3093	37.8132	19.5039	0.515796		Labor Cost	402.804	831.89	429.085	0.515796		Labor Cost	125675	259550	133875	0.515796
Equipment Cost	88.3304	58.6378	-29.6926	-0.506373		Equipment Cost	1943.27	1290.03	-653.237	-0.506373		Equipment Cost	606300	402490	-203810	-0.506373
Consumable Cost	244.18	296.948	52.7687	0.177703		Consumable Cost	5371.95	6532.86	1160.91	0.177703		Consumable Cost	1.67605e+06	2.03825e+06	362205	0.177703
Learning Cost	0.674926	2.00197	1.32705	0.662869		Learning Cost	14.8484	44.0434	29.195	0.662869		Learning Cost	4632.69	13741.5	9108.85	0.662869
Misuse Cost	0.00530849	0.0213609	0.0160525	0.751486		Misuse Cost	0.116787	0.469941	0.353154	0.751486		Misuse Cost	36.4375	146.622	110.184	0.751486
Storage space cost	0.0687063	0.343531	0.274825	0.8		Storage space cost	1.51154	7.55769	6.04615	0.8		Storage space cost	471.6	2358	1886.4	0.8
Total	351.568	395.766	44.1979	0.111677		Total	7734.5	8706.86	972.354	0.111677		Total	2.41316e+06	2.71654e+06	303375	0.111677
直接成本	350.819	372.483	21.6633	0.0581593		直接成本	7718.03	8462.26	744.232	0.0879472		直接成本	2.40802e+06	2.49954e+06	91512.7	0.0366119
间接成本	0.748941	2.36686	1.61792	0.683573		间接成本	16.4767	52.071	35.5943	0.683573		间接成本	5140.73	16246.2	1996.58	0.122896
12 devices	CDDS service volume per day (person-times)	SPDDS service volume per day (person-times)				12 devices	CDDS service volume per day (person-times)	SPDDS service volume per day (person-times)				12 devices	CDDS service volume per day (person-times)	SPDDS service volume per day (person-times)
daily service volume (person-times)	24	24		Cost savings		daily service volume (person-times)	24	24		Cost savings		daily service volume (person-times)	24	24		Cost savings
Cost Composition	CDDS single treatment cost	SPDDS single treatment cost	CDDS Single Treatment Cost Savings	Reduction		Cost Composition	CDDS cost per day of treatment	SPDDS cost per day of treatment	CDDS Cost Savings per day of treatmen	Reduction		Cost Composition	CDDS Cost per year of treatment	SPDDS Cost per year of treatment	CDDS Cost Savings per year of treatment	Reduction
Labor Cost	18.2815	37.8132	19.5317	0.516532		Labor Cost	438.755	907.516	468.761	0.516532		Labor Cost	136892	283145	146253	0.516532
Equipment Cost	85.1095	58.6378	-26.4717	-0.451444		Equipment Cost	2042.63	1407.31	-635.321	-0.451444		Equipment Cost	637300	439080	-198220	-0.451444
Consumable Cost	243.005	296.948	53.9436	0.18166		Consumable Cost	5832.12	7126.76	1294.65	0.18166		Consumable Cost	1.81962e+06	2.22355e+06	403929	0.18166
Learning Cost	0.674926	2.00197	1.32705	0.662869		Learning Cost	16.1982	48.0473	31.8491	0.662869		Learning Cost	5053.85	14990.8	9936.92	0.662869
Misuse Cost	0.00530849	0.0213609	0.0160525	0.751486		Misuse Cost	0.127404	0.512663	0.385259	0.751486		Misuse Cost	39.75	159.951	120.201	0.751486
Storage space cost	0.0629808	0.314904	0.251923	0.8		Storage space cost	1.51154	7.55769	6.04615	0.8		Storage space cost	471.6	2358	1886.4	0.8
Total	347.139	395.738	48.5986	0.122805		Total	8331.34	9497.7	1166.37	0.122805		Total	2.59938e+06	2.96328e+06	363906	0.122805
直接成本	346.396	372.483	26.0869	0.0700352		直接成本	8313.5	9231.55	918.055	0.0994475		直接成本	2.59381e+06	2.72677e+06	132956	0.0487594
间接成本	0.743215	2.33824	1.59502	0.682147		间接成本	17.8372	56.1177	38.2805	0.682147		间接成本	5565.2	17508.7	2006.6	0.114606
15 devices	CDDS service volume per day (person-times)	SPDDS service volume per day (person-times)				15 devices	CDDS service volume per day (person-times)	SPDDS service volume per day (person-times)				15 devices	CDDS service volume per day (person-times)	SPDDS service volume per day (person-times)
daily service volume (person-times)	30	30		Cost savings		daily service volume (person-times)	30	30		Cost savings		daily service volume (person-times)	30	30		Cost savings
Cost Composition	CDDS single treatment cost	SPDDS single treatment cost	CDDS Single Treatment Cost Savings	Reduction		Cost Composition	CDDS cost per day of treatment	SPDDS cost per day of treatment	CDDS Cost Savings per day of treatmen	Reduction		Cost Composition	CDDS Cost per year of treatment	SPDDS Cost per year of treatment	CDDS Cost Savings per year of treatment	Reduction
Labor Cost	18.2203	37.8132	19.5929	0.51815		Labor Cost	546.608	1134.39	587.787	0.51815		Labor Cost	170542	353931	183390	0.51815
Equipment Cost	78.0235	58.6378	-19.3857	-0.3306		Equipment Cost	2340.71	1759.13	-581.571	-0.3306		Equipment Cost	730300	548850	-181450	-0.3306
Consumable Cost	240.42	296.948	56.5282	0.190364		Consumable Cost	7212.61	8908.45	1695.85	0.190364		Consumable Cost	2.25033e+06	2.77944e+06	529104	0.190364
Learning Cost	0.674926	2.00197	1.32705	0.662869		Learning Cost	20.2478	60.0592	39.8114	0.662869		Learning Cost	6317.31	18738.5	12421.2	0.662869
Misuse Cost	0.00530849	0.0213609	0.0160525	0.751486		Misuse Cost	0.159255	0.640828	0.481574	0.751486		Misuse Cost	49.6875	199.938	150.251	0.751486
Storage space cost	0.0503846	0.251923	0.201538	0.8		Storage space cost	1.51154	7.55769	6.04615	0.8		Storage space cost	471.6	2358	1886.4	0.8
Total	337.395	395.675	58.28	0.147293		Total	10121.8	11870.2	1748.4	0.147293		Total	3.15801e+06	3.70351e+06	545501	0.147293
直接成本	336.797	358.337	21.5399	0.0601107		直接成本	10103.9	11115.1	1011.16	0.0909718		直接成本	3.15242e+06	3.27605e+06	123634	0.0377388
间接成本	0.730619	2.27526	1.54464	0.678885		间接成本	21.9186	68.2577	46.3391	0.678885		间接成本	6838.6	21296.4	2036.65	0.0956336
20 devices	CDDS service volume per day (person-times)	SPDDS service volume per day (person-times)				20 devices	CDDS service volume per day (person-times)	SPDDS service volume per day (person-times)				20 devices	CDDS service volume per day (person-times)	SPDDS service volume per day (person-times)
daily service volume (person-times)	40	40		Cost savings		daily service volume (person-times)	40	40		Cost savings		daily service volume (person-times)	40	40		Cost savings
Cost Composition	CDDS single treatment cost	SPDDS single treatment cost	CDDS Single Treatment Cost Savings	Reduction		Cost Composition	CDDS cost per day of treatment	SPDDS cost per day of treatment	CDDS Cost Savings per day of treatmen	Reduction		Cost Composition	CDDS Cost per year of treatment	SPDDS Cost per year of treatment	CDDS Cost Savings per year of treatment	Reduction
Labor Cost	18.1591	37.8132	19.6541	0.519769		Labor Cost	726.362	1512.53	786.164	0.519769		Labor Cost	226625	471908	245283	0.519769
Equipment Cost	70.9375	58.6378	-12.2997	-0.209757		Equipment Cost	2837.5	2345.51	-491.987	-0.209757		Equipment Cost	885300	731800	-153500	-0.209757
Consumable Cost	239.518	296.948	57.4301	0.193401		Consumable Cost	9580.73	11877.9	2297.2	0.193401		Consumable Cost	2.98919e+06	3.70592e+06	716728	0.193401
Learning Cost	0.674926	2.00197	1.32705	0.662869		Learning Cost	26.997	80.0789	53.0819	0.662869		Learning Cost	8423.08	24984.6	16561.5	0.662869
Misuse Cost	0.00530849	0.0213609	0.0160525	0.751486		Misuse Cost	0.21234	0.854438	0.642098	0.751486		Misuse Cost	66.25	266.585	200.335	0.751486
Storage space cost	0.0377885	0.188942	0.151154	0.8		Storage space cost	1.51154	7.55769	6.04615	0.8		Storage space cost	471.6	2358	1886.4	0.8
Total	329.333	395.612	66.2788	0.167535		Total	13173.3	15824.5	2651.15	0.167535		Total	4.11007e+06	4.93723e+06	827159	0.167535
直接成本	328.748	358.337	29.589	0.0825732		直接成本	13149.9	14820.1	1670.18	0.112697		直接成本	4.10277e+06	4.36807e+06	265299	0.060736
间接成本	0.718023	2.21228	1.49425	0.675437		间接成本	28.7209	88.491	59.7701	0.675437		间接成本	8960.93	27609.2	2086.73	0.0755811
25 devices	CDDS service volume per day (person-times)	SPDDS service volume per day (person-times)				25 devices	CDDS service volume per day (person-times)	SPDDS service volume per day (person-times)				25 devices	CDDS service volume per day (person-times)	SPDDS service volume per day (person-times)
daily service volume (person-times)	50	50		Cost savings		daily service volume (person-times)	50	50		Cost savings		daily service volume (person-times)	50	50		Cost savings
Cost Composition	CDDS single treatment cost	SPDDS single treatment cost	CDDS Single Treatment Cost Savings	Reduction		Cost Composition	CDDS cost per day of treatment	SPDDS cost per day of treatment	CDDS Cost Savings per day of treatmen	Reduction		Cost Composition	CDDS Cost per year of treatment	SPDDS Cost per year of treatment	CDDS Cost Savings per year of treatment	Reduction
Labor Cost	18.1223	37.8132	19.6908	0.52074		Labor Cost	906.116	1890.66	984.542	0.52074		Labor Cost	282708	589885	307177	0.52074
Equipment Cost	66.6859	58.6378	-8.04808	-0.137251		Equipment Cost	3334.29	2931.89	-402.404	-0.137251		Equipment Cost	1040300	914750	-125550	-0.137251
Consumable Cost	237.631	296.948	59.3174	0.199757		Consumable Cost	11881.5	14847.4	2965.87	0.199757		Consumable Cost	3.70704e+06	4.63239e+06	925352	0.199757
Learning Cost	0.674926	2.00197	1.32705	0.662869		Learning Cost	33.7463	100.099	66.3523	0.662869		Learning Cost	10528.8	31230.8	20701.9	0.662869
Misuse Cost	0.00530849	0.0213609	0.0160525	0.751486		Misuse Cost	0.265425	1.06805	0.802623	0.751486		Misuse Cost	82.8125	333.231	250.418	0.751486
Storage space cost	0.0302308	0.151154	0.120923	0.8		Storage space cost	1.51154	7.55769	6.04615	0.8		Storage space cost	471.6	2358	1886.4	0.8
Total	323.15	395.574	72.4242	0.183086		Total	16157.5	19778.7	3621.21	0.183086		Total	5.04113e+06	6.17095e+06	1.12982e+06	0.183086
直接成本	322.572	358.337	35.7647	0.0998074		直接成本	16128.6	18525.1	2396.5	0.129365		直接成本	5.03213e+06	5.46009e+06	427964	0.0783804
间接成本	0.710465	2.17449	1.46402	0.673272		间接成本	35.5233	108.724	73.2011	0.673272		间接成本	11083.3	33922	2136.82	0.0629921
30 devices	CDDS service volume per day (person-times)	SPDDS service volume per day (person-times)				30 devices	CDDS service volume per day (person-times)	SPDDS service volume per day (person-times)				30 devices	CDDS service volume per day (person-times)	SPDDS service volume per day (person-times)
daily service volume (person-times)	60	60		Cost savings		daily service volume (person-times)	60	60		Cost savings		daily service volume (person-times)	60	60		Cost savings
Cost Composition	CDDS single treatment cost	SPDDS single treatment cost	CDDS Single Treatment Cost Savings	Reduction		Cost Composition	CDDS cost per day of treatment	SPDDS cost per day of treatment	CDDS Cost Savings per day of treatmen	Reduction		Cost Composition	CDDS Cost per year of treatment	SPDDS Cost per year of treatment	CDDS Cost Savings per year of treatment	Reduction
Labor Cost	18.0978	37.8132	19.7153	0.521388		Labor Cost	1085.87	2268.79	1182.92	0.521388		Labor Cost	338792	707862	369071	0.521388
Equipment Cost	63.8515	58.6378	-5.21368	-0.0889132		Equipment Cost	3831.09	3518.27	-312.821	-0.0889132		Equipment Cost	1195300	1097700	-97600	-0.0889132
Consumable Cost	236.373	296.948	60.5756	0.203994		Consumable Cost	14182.4	17816.9	3634.54	0.203994		Consumable Cost	4.4249e+06	5.55887e+06	1.13398e+06	0.203994
Learning Cost	0.674926	2.00197	1.32705	0.662869		Learning Cost	40.4956	120.118	79.6228	0.662869		Learning Cost	12634.6	37476.9	24842.3	0.662869
Misuse Cost	0.00530849	0.0213609	0.0160525	0.751486		Misuse Cost	0.31851	1.28166	0.963147	0.751486		Misuse Cost	99.375	399.877	300.502	0.751486
Storage space cost	0.0251923	0.125962	0.100769	0.8		Storage space cost	1.51154	7.55769	6.04615	0.8		Storage space cost	471.6	2358	1886.4	0.8
Total	319.028	395.549	76.5211	0.193456		Total	19141.7	23732.9	4591.27	0.193456		Total	5.97219e+06	7.40467e+06	1.43248e+06	0.193456
直接成本	318.455	358.337	39.8817	0.111297		直接成本	19107.3	22230.1	3122.83	0.140477		直接成本	5.96148e+06	6.55211e+06	590629	0.0901433
间接成本	0.705427	2.14929	1.44387	0.671787		间接成本	42.3256	128.958	86.6321	0.671787		间接成本	13205.6	40234.8	2186.9	0.0543535
35 devices	CDDS service volume per day (person-times)	SPDDS service volume per day (person-times)				35 devices	CDDS service volume per day (person-times)	SPDDS service volume per day (person-times)				35 devices	CDDS service volume per day (person-times)	SPDDS service volume per day (person-times)
daily service volume (person-times)	70	70		Cost savings		daily service volume (person-times)	70	70		Cost savings		daily service volume (person-times)	70	70		Cost savings
Cost Composition	CDDS single treatment cost	SPDDS single treatment cost	CDDS Single Treatment Cost Savings	Reduction		Cost Composition	CDDS cost per day of treatment	SPDDS cost per day of treatment	CDDS Cost Savings per day of treatmen	Reduction		Cost Composition	CDDS Cost per year of treatment	SPDDS Cost per year of treatment	CDDS Cost Savings per year of treatment	Reduction
Labor Cost	18.0804	37.8132	19.7328	0.52185		Labor Cost	1265.62	2646.92	1381.3	0.52185		Labor Cost	394875	825840	430965	0.52185
Equipment Cost	61.8269	58.6378	-3.1891	-0.0543864		Equipment Cost	4327.88	4104.65	-223.237	-0.0543864		Equipment Cost	1350300	1280650	-69650	-0.0543864
Consumable Cost	236.436	296.948	60.5128	0.203782		Consumable Cost	16550.5	20786.4	4235.9	0.203782		Consumable Cost	5.16375e+06	6.48535e+06	1.3216e+06	0.203782
Learning Cost	0.674926	2.00197	1.32705	0.662869		Learning Cost	47.2448	140.138	92.8932	0.662869		Learning Cost	14740.4	43723.1	28982.7	0.662869
Misuse Cost	0.00530849	0.0213609	0.0160525	0.751486		Misuse Cost	0.371595	1.49527	1.12367	0.751486		Misuse Cost	115.938	466.523	350.586	0.751486
Storage space cost	0.0215934	0.107967	0.0863736	0.8		Storage space cost	1.51154	7.55769	6.04615	0.8		Storage space cost	471.6	2358	1886.4	0.8
Total	317.045	395.531	78.486	0.198432		Total	22193.1	27687.1	5494.02	0.198432		Total	6.92426e+06	8.63839e+06	1.71413e+06	0.198432
直接成本	316.343	393.399	77.0565	0.195873		直接成本	22144	27538	5393.96	0.195873		直接成本	6.90893e+06	8.59184e+06	1.68291e+06	0.195873
间接成本	0.701828	2.1313	1.42947	0.670704		间接成本	49.128	149.191	100.063	0.670704		间接成本	15327.9	46547.6	31219.7	0.670704
40 devices	CDDS service volume per day (person-times)	SPDDS service volume per day (person-times)				40 devices	CDDS service volume per day (person-times)	SPDDS service volume per day (person-times)				40 devices	CDDS service volume per day (person-times)	SPDDS service volume per day (person-times)
daily service volume (person-times)	80	80		Cost savings		daily service volume (person-times)	80	80		Cost savings		daily service volume (person-times)	80	80		Cost savings
Cost Composition	CDDS single treatment cost	SPDDS single treatment cost	CDDS Single Treatment Cost Savings	Reduction		Cost Composition	CDDS cost per day of treatment	SPDDS cost per day of treatment	CDDS Cost Savings per day of treatmen	Reduction		Cost Composition	CDDS Cost per year of treatment	SPDDS Cost per year of treatment	CDDS Cost Savings per year of treatment	Reduction
Labor Cost	18.0672	37.8132	19.7459	0.522197		Labor Cost	1445.38	3025.05	1579.67	0.522197		Labor Cost	450958	943817	492858	0.522197
Equipment Cost	60.3085	58.6378	-1.67067	-0.0284914		Equipment Cost	4824.68	4691.03	-133.654	-0.0284914		Equipment Cost	1505300	1463600	-41700	-0.0284914
Consumable Cost	235.641	296.948	61.307	0.206457		Consumable Cost	18851.3	23755.9	4904.56	0.206457		Consumable Cost	5.88161e+06	7.41183e+06	1.53022e+06	0.206457
Learning Cost	0.674926	2.00197	1.32705	0.662869		Learning Cost	53.9941	160.158	106.164	0.662869		Learning Cost	16846.2	49969.2	33123.1	0.662869
Misuse Cost	0.00530849	0.0213609	0.0160525	0.751486		Misuse Cost	0.424679	1.70888	1.2842	0.751486		Misuse Cost	132.5	533.169	400.669	0.751486
Storage space cost	0.0188942	0.0944712	0.0755769	0.8		Storage space cost	1.51154	7.55769	6.04615	0.8		Storage space cost	471.6	2358	1886.4	0.8
Total	314.716	395.517	80.801	0.204292		Total	25177.3	31641.4	6464.08	0.204292		Total	7.85532e+06	9.87211e+06	2.01679e+06	0.204292
直接成本	314.15	358.337	44.1868	0.123311		直接成本	25132	29640.2	4508.17	0.152097		直接成本	7.84119e+06	8.73614e+06	894958	0.102443
间接成本	0.699129	2.1178	1.41868	0.66988		间接成本	55.9303	169.424	113.494	0.66988		间接成本	17450.3	52860.4	2287.07	0.0432662
45 devices	CDDS service volume per day (person-times)	SPDDS service volume per day (person-times)				45 devices	CDDS service volume per day (person-times)	SPDDS service volume per day (person-times)				45 devices	CDDS service volume per day (person-times)	SPDDS service volume per day (person-times)
daily service volume (person-times)	90	90		Cost savings		daily service volume (person-times)	90	90		Cost savings		daily service volume (person-times)	90	90		Cost savings
Cost Composition	CDDS single treatment cost	SPDDS single treatment cost	CDDS Single Treatment Cost Savings	Reduction		Cost Composition	CDDS cost per day of treatment	SPDDS cost per day of treatment	CDDS Cost Savings per day of treatmen	Reduction		Cost Composition	CDDS Cost per year of treatment	SPDDS Cost per year of treatment	CDDS Cost Savings per year of treatment	Reduction
Labor Cost	18.057	37.8132	19.7561	0.522467		Labor Cost	1625.13	3403.18	1778.05	0.522467		Labor Cost	507042	1.06179e+06	554752	0.522467
Equipment Cost	59.1275	58.6378	-0.489672	-0.00835079		Equipment Cost	5321.47	5277.4	-44.0705	-0.00835079		Equipment Cost	1660300	1646550	-13750	-0.00835079
Consumable Cost	235.024	296.948	61.9248	0.208537		Consumable Cost	21152.1	26725.4	5573.23	0.208537		Consumable Cost	6.59946e+06	8.33831e+06	1.73885e+06	0.208537
Learning Cost	0.674926	2.00197	1.32705	0.662869		Learning Cost	60.7433	180.178	119.434	0.662869		Learning Cost	18951.9	56215.4	37263.5	0.662869
Misuse Cost	0.00530849	0.0213609	0.0160525	0.751486		Misuse Cost	0.477764	1.92249	1.44472	0.751486		Misuse Cost	149.062	599.815	450.753	0.751486
Storage space cost	0.0167949	0.0839744	0.0671795	0.8		Storage space cost	1.51154	7.55769	6.04615	0.8		Storage space cost	471.6	2358	1886.4	0.8
Total	312.905	395.507	82.6015	0.20885		Total	28161.5	35595.6	7434.13	0.20885		Total	8.78638e+06	1.11058e+07	2.31945e+06	0.20885
直接成本	312.208	393.399	81.1912	0.206384		直接成本	28098.7	35405.9	7307.21	0.206384		直接成本	8.7668e+06	1.10467e+07	2.27985e+06	0.206384
间接成本	0.697029	2.10731	1.41028	0.669232		间接成本	62.7326	189.658	126.925	0.669232		间接成本	19572.6	59173.2	39600.6	0.669232
50 devices	CDDS service volume per day (person-times)	SPDDS service volume per day (person-times)				50 devices	CDDS service volume per day (person-times)	SPDDS service volume per day (person-times)				50 devices	CDDS service volume per day (person-times)	SPDDS service volume per day (person-times)
daily service volume (person-times)	100	100		Cost savings		daily service volume (person-times)	100	100		Cost savings		daily service volume (person-times)	100	100		Cost savings
Cost Composition	CDDS single treatment cost	SPDDS single treatment cost	CDDS Single Treatment Cost Savings	Reduction		Cost Composition	CDDS cost per day of treatment	SPDDS cost per day of treatment	CDDS Cost Savings per day of treatmen	Reduction		Cost Composition	CDDS Cost per year of treatment	SPDDS Cost per year of treatment	CDDS Cost Savings per year of treatment	Reduction
Labor Cost	18.0489	37.8132	19.7643	0.522683		Labor Cost	1804.89	3781.32	1976.43	0.522683		Labor Cost	563125	1.17977e+06	616646	0.522683
Equipment Cost	58.1827	58.6378	0.455128	0.00776168		Equipment Cost	5818.27	5863.78	45.5128	0.00776168		Equipment Cost	1815300	1829500	14200	0.00776168
Consumable Cost	235.202	296.948	61.7459	0.207935		Consumable Cost	23520.2	29694.8	6174.59	0.207935		Consumable Cost	7.33832e+06	9.26479e+06	1.92647e+06	0.207935
Learning Cost	0.674926	2.00197	1.32705	0.662869		Learning Cost	67.4926	200.197	132.705	0.662869		Learning Cost	21057.7	62461.5	41403.8	0.662869
Misuse Cost	0.00530849	0.0213609	0.0160525	0.751486		Misuse Cost	0.530849	2.13609	1.60525	0.751486		Misuse Cost	165.625	666.462	500.837	0.751486
Storage space cost	0.0151154	0.0755769	0.0604615	0.8		Storage space cost	1.51154	7.55769	6.04615	0.8		Storage space cost	471.6	2358	1886.4	0.8
Total	312.129	395.498	83.3689	0.210794		Total	31212.9	39549.8	8336.89	0.210794		Total	9.73844e+06	1.23395e+07	2.60111e+06	0.210794
直接成本	311.567	358.337	46.7698	0.130519		直接成本	31156.7	37050.2	5893.52	0.159068		直接成本	9.72089e+06	1.09202e+07	1.19929e+06	0.109823
间接成本	0.69535	2.09891	1.40356	0.668709		间接成本	69.535	209.891	140.356	0.668709		间接成本	21694.9	65486	2387.24	0.0364542

## Sheet: Scenario 2&3
Scenario 2
4 devices	CDDS service volume per day (person-times)	SPDDS service volume per day (person-times)				4 devices	CDDS service volume per day (person-times)	SPDDS service volume per day (person-times)				4 devices	CDDS service volume per day (person-times)	SPDDS service volume per day (person-times)
daily service volume (person-times)	12	12		No cost savings		daily service volume (person-times)	12	12		No cost savings		daily service volume (person-times)	12	12		No cost savings
Cost Composition	CDDS single treatment cost	SPDDS single treatment cost	CDDS Single Treatment Cost Savings	Reduction		Cost Composition	CDDS cost per day of treatment	SPDDS cost per day of treatment	CDDS Cost Savings per day of treatmen	Reduction		Cost Composition	CDDS Cost per year of treatment	SPDDS Cost per year of treatment	CDDS Cost Savings per year of treatment	Reduction
Labor Cost	18.5875	37.8132	19.2256	0.508438		Labor Cost	223.05	453.758	230.708	0.508438		Labor Cost	69591.7	141572	71980.8	0.508438
Equipment Cost	103.98	39.0919	-64.8878	-1.65988		Equipment Cost	1247.76	469.103	-778.654	-1.65988		Equipment Cost	389300	146360	-242940	-1.65988
Consumable Cost	255.928	296.948	41.0205	0.13814		Consumable Cost	3071.13	3563.38	492.246	0.13814		Consumable Cost	958194	1.11177e+06	153581	0.13814
Learning Cost	0.674926	2.00197	1.32705	0.662869		Learning Cost	8.09911	24.0237	15.9246	0.662869		Learning Cost	2526.92	7495.38	4968.46	0.662869
Misuse Cost	0.00530849	0.0213609	0.0160525	0.751486		Misuse Cost	0.0637019	0.256331	0.192629	0.751486		Misuse Cost	19.875	79.9754	60.1004	0.751486
Storage space cost	0.125962	0.629808	0.503846	0.8		Storage space cost	1.51154	7.55769	6.04615	0.8		Storage space cost	471.6	2358	1886.4	0.8
Total	379.301	376.507	-2.79476	-0.00742287		Total	4551.62	4518.08	-33.5371	-0.00742287		Total	1.4201e+06	1.40964e+06	-10463.6	-0.00742287
5 devices	CDDS service volume per day (person-times)	SPDDS service volume per day (person-times)				5 devices	CDDS service volume per day (person-times)	SPDDS service volume per day (person-times)				5 devices	CDDS service volume per day (person-times)	SPDDS service volume per day (person-times)
daily service volume (person-times)	15	15		Cost savings		daily service volume (person-times)	15	15		Cost savings		daily service volume (person-times)	15	15		Cost savings
Cost Composition	CDDS single treatment cost	SPDDS single treatment cost	CDDS Single Treatment Cost Savings	Reduction		Cost Composition	CDDS cost per day of treatment	SPDDS cost per day of treatment	CDDS Cost Savings per day of treatmen	Reduction		Cost Composition	CDDS Cost per year of treatment	SPDDS Cost per year of treatment	CDDS Cost Savings per year of treatment	Reduction
Labor Cost	18.4651	37.8132	19.3481	0.511675		Labor Cost	276.976	567.197	290.221	0.511675		Labor Cost	86416.7	176966	90548.9	0.511675
Equipment Cost	89.8077	39.0919	-50.7158	-1.29735		Equipment Cost	1347.12	586.378	-760.737	-1.29735		Equipment Cost	420300	182950	-237350	-1.29735
Consumable Cost	250.759	296.948	46.1897	0.155548		Consumable Cost	3761.38	4454.23	692.846	0.155548		Consumable Cost	1.17355e+06	1.38972e+06	216168	0.155548
Learning Cost	0.674926	2.00197	1.32705	0.662869		Learning Cost	10.1239	30.0296	19.9057	0.662869		Learning Cost	3158.65	9369.23	6210.58	0.662869
Misuse Cost	0.00530849	0.0213609	0.0160525	0.751486		Misuse Cost	0.0796274	0.320414	0.240787	0.751486		Misuse Cost	24.8438	99.9692	75.1255	0.751486
Storage space cost	0.100769	0.503846	0.403077	0.8		Storage space cost	1.51154	7.55769	6.04615	0.8		Storage space cost	471.6	2358	1886.4	0.8
Total	359.812	376.381	16.5681	0.0440196		Total	5397.19	5645.71	248.522	0.0440196		Total	1.68392e+06	1.76146e+06	77538.9	0.0440196
6 devices	CDDS service volume per day (person-times)	SPDDS service volume per day (person-times)				6 devices	CDDS service volume per day (person-times)	SPDDS service volume per day (person-times)				6 devices	CDDS service volume per day (person-times)	SPDDS service volume per day (person-times)
daily service volume (person-times)	18	18		Cost savings		daily service volume (person-times)	18	18		Cost savings		daily service volume (person-times)	18	18		Cost savings
Cost Composition	CDDS single treatment cost	SPDDS single treatment cost	CDDS Single Treatment Cost Savings	Reduction		Cost Composition	CDDS cost per day of treatment	SPDDS cost per day of treatment	CDDS Cost Savings per day of treatmen	Reduction		Cost Composition	CDDS Cost per year of treatment	SPDDS Cost per year of treatment	CDDS Cost Savings per year of treatment	Reduction
Labor Cost	18.3835	37.8132	19.4297	0.513834		Labor Cost	330.903	680.637	349.734	0.513834		Labor Cost	103242	212359	109117	0.513834
Equipment Cost	80.3597	39.0919	-41.2678	-1.05566		Equipment Cost	1446.47	703.654	-742.821	-1.05566		Equipment Cost	451300	219540	-231760	-1.05566
Consumable Cost	247.312	296.948	49.6359	0.167153		Consumable Cost	4451.62	5345.07	893.446	0.167153		Consumable Cost	1.38891e+06	1.66766e+06	278755	0.167153
Learning Cost	0.674926	2.00197	1.32705	0.662869		Learning Cost	12.1487	36.0355	23.8868	0.662869		Learning Cost	3790.38	11243.1	7452.69	0.662869
Misuse Cost	0.00530849	0.0213609	0.0160525	0.751486		Misuse Cost	0.0955529	0.384497	0.288944	0.751486		Misuse Cost	29.8125	119.963	90.1506	0.751486
Storage space cost	0.0839744	0.419872	0.335897	0.8		Storage space cost	1.51154	7.55769	6.04615	0.8		Storage space cost	471.6	2358	1886.4	0.8
Total	346.82	376.297	29.4767	0.0783338		Total	6242.76	6773.34	530.581	0.0783338		Total	1.94774e+06	2.11328e+06	165541	0.0783338
7 devices	CDDS service volume per day (person-times)	SPDDS service volume per day (person-times)				7 devices	CDDS service volume per day (person-times)	SPDDS service volume per day (person-times)				7 devices	CDDS service volume per day (person-times)	SPDDS service volume per day (person-times)
daily service volume (person-times)	21	21		Cost savings		daily service volume (person-times)	21	21		Cost savings		daily service volume (person-times)	21	21		Cost savings
Cost Composition	CDDS single treatment cost	SPDDS single treatment cost	CDDS Single Treatment Cost Savings	Reduction		Cost Composition	CDDS cost per day of treatment	SPDDS cost per day of treatment	CDDS Cost Savings per day of treatmen	Reduction		Cost Composition	CDDS Cost per year of treatment	SPDDS Cost per year of treatment	CDDS Cost Savings per year of treatment	Reduction
Labor Cost	18.3252	37.8132	19.488	0.515375		Labor Cost	384.829	794.076	409.247	0.515375		Labor Cost	120067	247752	127685	0.515375
Equipment Cost	73.6111	39.0919	-34.5192	-0.883028		Equipment Cost	1545.83	820.929	-724.904	-0.883028		Equipment Cost	482300	256130	-226170	-0.883028
Consumable Cost	244.851	296.948	52.0974	0.175443		Consumable Cost	5141.87	6235.92	1094.05	0.175443		Consumable Cost	1.60426e+06	1.94561e+06	341342	0.175443
Learning Cost	0.674926	2.00197	1.32705	0.662869		Learning Cost	14.1734	42.0414	27.868	0.662869		Learning Cost	4422.12	13116.9	8694.81	0.662869
Misuse Cost	0.00530849	0.0213609	0.0160525	0.751486		Misuse Cost	0.111478	0.44858	0.337102	0.751486		Misuse Cost	34.7812	139.957	105.176	0.751486
Storage space cost	0.071978	0.35989	0.287912	0.8		Storage space cost	1.51154	7.55769	6.04615	0.8		Storage space cost	471.6	2358	1886.4	0.8
Total	337.539	376.237	38.6972	0.102853		Total	7088.33	7900.97	812.64	0.102853		Total	2.21156e+06	2.4651e+06	253544	0.102853
8 devices	CDDS service volume per day (person-times)	SPDDS service volume per day (person-times)				8 devices	CDDS service volume per day (person-times)	SPDDS service volume per day (person-times)				8 devices	CDDS service volume per day (person-times)	SPDDS service volume per day (person-times)
daily service volume (person-times)	24	24		Cost savings		daily service volume (person-times)	24	24		Cost savings		daily service volume (person-times)	24	24		Cost savings
Cost Composition	CDDS single treatment cost	SPDDS single treatment cost	CDDS Single Treatment Cost Savings	Reduction		Cost Composition	CDDS cost per day of treatment	SPDDS cost per day of treatment	CDDS Cost Savings per day of treatmen	Reduction		Cost Composition	CDDS Cost per year of treatment	SPDDS Cost per year of treatment	CDDS Cost Savings per year of treatment	Reduction
Labor Cost	18.2815	37.8132	19.5317	0.516532		Labor Cost	438.755	907.516	468.761	0.516532		Labor Cost	136892	283145	146253	0.516532
Equipment Cost	68.5497	39.0919	-29.4578	-0.753553		Equipment Cost	1645.19	938.205	-706.987	-0.753553		Equipment Cost	513300	292720	-220580	-0.753553
Consumable Cost	243.005	296.948	53.9436	0.18166		Consumable Cost	5832.12	7126.76	1294.65	0.18166		Consumable Cost	1.81962e+06	2.22355e+06	403929	0.18166
Learning Cost	0.674926	2.00197	1.32705	0.662869		Learning Cost	16.1982	48.0473	31.8491	0.662869		Learning Cost	5053.85	14990.8	9936.92	0.662869
Misuse Cost	0.00530849	0.0213609	0.0160525	0.751486		Misuse Cost	0.127404	0.512663	0.385259	0.751486		Misuse Cost	39.75	159.951	120.201	0.751486
Storage space cost	0.0629808	0.314904	0.251923	0.8		Storage space cost	1.51154	7.55769	6.04615	0.8		Storage space cost	471.6	2358	1886.4	0.8
Total	330.579	376.192	45.6125	0.121248		Total	7933.9	9028.6	1094.7	0.121248		Total	2.47538e+06	2.81692e+06	341546	0.121248
9 devices	CDDS service volume per day (person-times)	SPDDS service volume per day (person-times)				9 devices	CDDS service volume per day (person-times)	SPDDS service volume per day (person-times)				9 devices	CDDS service volume per day (person-times)	SPDDS service volume per day (person-times)
daily service volume (person-times)	27	27		Cost savings		daily service volume (person-times)	27	27		Cost savings		daily service volume (person-times)	27	27		Cost savings
Cost Composition	CDDS single treatment cost	SPDDS single treatment cost	CDDS Single Treatment Cost Savings	Reduction		Cost Composition	CDDS cost per day of treatment	SPDDS cost per day of treatment	CDDS Cost Savings per day of treatmen	Reduction		Cost Composition	CDDS Cost per year of treatment	SPDDS Cost per year of treatment	CDDS Cost Savings per year of treatment	Reduction
Labor Cost	18.2475	37.8132	19.5657	0.517431		Labor Cost	492.682	1020.96	528.274	0.517431		Labor Cost	153717	318538	164821	0.517431
Equipment Cost	64.613	39.0919	-25.5211	-0.65285		Equipment Cost	1744.55	1055.48	-689.071	-0.65285		Equipment Cost	544300	329310	-214990	-0.65285
Consumable Cost	241.569	296.948	55.3795	0.186495		Consumable Cost	6522.36	8017.61	1495.25	0.186495		Consumable Cost	2.03498e+06	2.50149e+06	466517	0.186495
Learning Cost	0.674926	2.00197	1.32705	0.662869		Learning Cost	18.223	54.0533	35.8303	0.662869		Learning Cost	5685.58	16864.6	11179	0.662869
Misuse Cost	0.00530849	0.0213609	0.0160525	0.751486		Misuse Cost	0.143329	0.576746	0.433416	0.751486		Misuse Cost	44.7188	179.945	135.226	0.751486
Storage space cost	0.0559829	0.279915	0.223932	0.8		Storage space cost	1.51154	7.55769	6.04615	0.8		Storage space cost	471.6	2358	1886.4	0.8
Total	325.166	376.157	50.9911	0.135558		Total	8779.47	10156.2	1376.76	0.135558		Total	2.73919e+06	3.16874e+06	429549	0.135558
直接成本	324.429	352.937	28.5074	0.0807719		直接成本	8759.59	9857.76	1098.16	0.111401		直接成本	2.73299e+06	2.90296e+06	169965	0.0585489
间接成本	0.736217	2.30325	1.56703	0.680357		间接成本	19.8779	62.1877	42.3098	0.680357		间接成本	6201.9	19402.6	2021.63	0.104194
10 devices	CDDS service volume per day (person-times)	SPDDS service volume per day (person-times)				10 devices	CDDS service volume per day (person-times)	SPDDS service volume per day (person-times)				10 devices	CDDS service volume per day (person-times)	SPDDS service volume per day (person-times)
daily service volume (person-times)	30	30		Cost savings		daily service volume (person-times)	30	30		Cost savings		daily service volume (person-times)	30	30		Cost savings
Cost Composition	CDDS single treatment cost	SPDDS single treatment cost	CDDS Single Treatment Cost Savings	Reduction		Cost Composition	CDDS cost per day of treatment	SPDDS cost per day of treatment	CDDS Cost Savings per day of treatmen	Reduction		Cost Composition	CDDS Cost per year of treatment	SPDDS Cost per year of treatment	CDDS Cost Savings per year of treatment	Reduction
Labor Cost	18.2203	37.8132	19.5929	0.51815		Labor Cost	546.608	1134.39	587.787	0.51815		Labor Cost	170542	353931	183390	0.51815
Equipment Cost	61.4637	39.0919	-22.3718	-0.572288		Equipment Cost	1843.91	1172.76	-671.154	-0.572288		Equipment Cost	575300	365900	-209400	-0.572288
Consumable Cost	240.42	296.948	56.5282	0.190364		Consumable Cost	7212.61	8908.45	1695.85	0.190364		Consumable Cost	2.25033e+06	2.77944e+06	529104	0.190364
Learning Cost	0.674926	2.00197	1.32705	0.662869		Learning Cost	20.2478	60.0592	39.8114	0.662869		Learning Cost	6317.31	18738.5	12421.2	0.662869
Misuse Cost	0.00530849	0.0213609	0.0160525	0.751486		Misuse Cost	0.159255	0.640828	0.481574	0.751486		Misuse Cost	49.6875	199.938	150.251	0.751486
Storage space cost	0.0503846	0.251923	0.201538	0.8		Storage space cost	1.51154	7.55769	6.04615	0.8		Storage space cost	471.6	2358	1886.4	0.8
Total	320.835	376.129	55.2939	0.147008		Total	9625.04	11283.9	1658.82	0.147008		Total	3.00301e+06	3.52056e+06	517551	0.147008
11 devices	CDDS service volume per day (person-times)	SPDDS service volume per day (person-times)				11 devices	CDDS service volume per day (person-times)	SPDDS service volume per day (person-times)				11 devices	CDDS service volume per day (person-times)	SPDDS service volume per day (person-times)
daily service volume (person-times)	33	33		Cost savings		daily service volume (person-times)	33	33		Cost savings		daily service volume (person-times)	33	33		Cost savings
Cost Composition	CDDS single treatment cost	SPDDS single treatment cost	CDDS Single Treatment Cost Savings	Reduction		Cost Composition	CDDS cost per day of treatment	SPDDS cost per day of treatment	CDDS Cost Savings per day of treatmen	Reduction		Cost Composition	CDDS Cost per year of treatment	SPDDS Cost per year of treatment	CDDS Cost Savings per year of treatment	Reduction
Labor Cost	18.198	37.8132	19.6152	0.518739		Labor Cost	600.534	1247.83	647.3	0.518739		Labor Cost	187367	389324	201958	0.518739
Equipment Cost	58.8869	39.0919	-19.7951	-0.506373		Equipment Cost	1943.27	1290.03	-653.237	-0.506373		Equipment Cost	606300	402490	-203810	-0.506373
Consumable Cost	241.52	296.948	55.4284	0.18666		Consumable Cost	7970.16	9799.3	1829.14	0.18666		Consumable Cost	2.48669e+06	3.05738e+06	570691	0.18666
Learning Cost	0.674926	2.00197	1.32705	0.662869		Learning Cost	22.2726	66.0651	43.7925	0.662869		Learning Cost	6949.04	20612.3	13663.3	0.662869
Misuse Cost	0.00530849	0.0213609	0.0160525	0.751486		Misuse Cost	0.17518	0.704911	0.529731	0.751486		Misuse Cost	54.6562	219.932	165.276	0.751486
Storage space cost	0.0458042	0.229021	0.183217	0.8		Storage space cost	1.51154	7.55769	6.04615	0.8		Storage space cost	471.6	2358	1886.4	0.8
Total	319.331	376.106	56.7748	0.150954		Total	10537.9	12411.5	1873.57	0.150954		Total	3.28783e+06	3.87238e+06	584554	0.150954
直接成本	318.605	352.937	34.3318	0.0972748		直接成本	10514	12048.4	1534.41	0.127354		直接成本	3.28036e+06	3.54806e+06	267704	0.0754508
间接成本	0.726039	2.25235	1.52632	0.677653		间接成本	23.9593	74.3277	50.3684	0.677653		间接成本	7475.29	23190.2	2051.68	0.0884715
12 devices	CDDS service volume per day (person-times)	SPDDS service volume per day (person-times)				12 devices	CDDS service volume per day (person-times)	SPDDS service volume per day (person-times)				12 devices	CDDS service volume per day (person-times)	SPDDS service volume per day (person-times)
daily service volume (person-times)	36	36		Cost savings		daily service volume (person-times)	36	36		Cost savings		daily service volume (person-times)	36	36		Cost savings
Cost Composition	CDDS single treatment cost	SPDDS single treatment cost	CDDS Single Treatment Cost Savings	Reduction		Cost Composition	CDDS cost per day of treatment	SPDDS cost per day of treatment	CDDS Cost Savings per day of treatmen	Reduction		Cost Composition	CDDS Cost per year of treatment	SPDDS Cost per year of treatment	CDDS Cost Savings per year of treatment	Reduction
Labor Cost	18.1795	37.8132	19.6337	0.519229		Labor Cost	654.46	1361.27	706.813	0.519229		Labor Cost	204192	424717	220526	0.519229
Equipment Cost	56.7397	39.0919	-17.6478	-0.451444		Equipment Cost	2042.63	1407.31	-635.321	-0.451444		Equipment Cost	637300	439080	-198220	-0.451444
Consumable Cost	240.567	296.948	56.3816	0.18987		Consumable Cost	8660.4	10690.1	2029.74	0.18987		Consumable Cost	2.70205e+06	3.33532e+06	633278	0.18987
Learning Cost	0.674926	2.00197	1.32705	0.662869		Learning Cost	24.2973	72.071	47.7737	0.662869		Learning Cost	7580.77	22486.2	14905.4	0.662869
Misuse Cost	0.00530849	0.0213609	0.0160525	0.751486		Misuse Cost	0.191106	0.768994	0.577888	0.751486		Misuse Cost	59.625	239.926	180.301	0.751486
Storage space cost	0.0419872	0.209936	0.167949	0.8		Storage space cost	1.51154	7.55769	6.04615	0.8		Storage space cost	471.6	2358	1886.4	0.8
Total	316.208	376.087	59.8786	0.159215		Total	11383.5	13539.1	2155.63	0.159215		Total	3.55165e+06	4.22421e+06	672556	0.159215
直接成本	315.486	352.937	37.4508	0.106112		直接成本	11357.5	13143.7	1786.18	0.135897		直接成本	3.54354e+06	3.87061e+06	327073	0.0845017
间接成本	0.722222	2.23327	1.51105	0.676608		间接成本	26	80.3977	54.3977	0.676608		间接成本	8111.99	25084.1	2066.7	0.0823909
15 devices	CDDS service volume per day (person-times)	SPDDS service volume per day (person-times)				15 devices	CDDS service volume per day (person-times)	SPDDS service volume per day (person-times)				15 devices	CDDS service volume per day (person-times)	SPDDS service volume per day (person-times)
daily service volume (person-times)	45	45		Cost savings		daily service volume (person-times)	45	45		Cost savings		daily service volume (person-times)	45	45		Cost savings
Cost Composition	CDDS single treatment cost	SPDDS single treatment cost	CDDS Single Treatment Cost Savings	Reduction		Cost Composition	CDDS cost per day of treatment	SPDDS cost per day of treatment	CDDS Cost Savings per day of treatmen	Reduction		Cost Composition	CDDS Cost per year of treatment	SPDDS Cost per year of treatment	CDDS Cost Savings per year of treatment	Reduction
Labor Cost	18.1387	37.8132	19.6745	0.520309		Labor Cost	816.239	1701.59	885.353	0.520309		Labor Cost	254667	530897	276230	0.520309
Equipment Cost	52.0157	39.0919	-12.9238	-0.3306		Equipment Cost	2340.71	1759.13	-581.571	-0.3306		Equipment Cost	730300	548850	-181450	-0.3306
Consumable Cost	238.47	296.948	58.4786	0.196932		Consumable Cost	10731.1	13362.7	2631.54	0.196932		Consumable Cost	3.34812e+06	4.16915e+06	821040	0.196932
Learning Cost	0.674926	2.00197	1.32705	0.662869		Learning Cost	30.3717	90.0888	59.7171	0.662869		Learning Cost	9475.96	28107.7	18631.7	0.662869
Misuse Cost	0.00530849	0.0213609	0.0160525	0.751486		Misuse Cost	0.238882	0.961243	0.72236	0.751486		Misuse Cost	74.5312	299.908	225.376	0.751486
Storage space cost	0.0335897	0.167949	0.134359	0.8		Storage space cost	1.51154	7.55769	6.04615	0.8		Storage space cost	471.6	2358	1886.4	0.8
Total	309.338	376.045	66.7068	0.177391		Total	13920.2	16922	3001.81	0.177391		Total	4.3431e+06	5.27967e+06	936563	0.177391
20 devices	CDDS service volume per day (person-times)	SPDDS service volume per day (person-times)				20 devices	CDDS service volume per day (person-times)	SPDDS service volume per day (person-times)				20 devices	CDDS service volume per day (person-times)	SPDDS service volume per day (person-times)
daily service volume (person-times)	60	60		Cost savings		daily service volume (person-times)	60	60		Cost savings		daily service volume (person-times)	60	60		Cost savings
Cost Composition	CDDS single treatment cost	SPDDS single treatment cost	CDDS Single Treatment Cost Savings	Reduction		Cost Composition	CDDS cost per day of treatment	SPDDS cost per day of treatment	CDDS Cost Savings per day of treatmen	Reduction		Cost Composition	CDDS Cost per year of treatment	SPDDS Cost per year of treatment	CDDS Cost Savings per year of treatment	Reduction
Labor Cost	18.0978	37.8132	19.7153	0.521388		Labor Cost	1085.87	2268.79	1182.92	0.521388		Labor Cost	338792	707862	369071	0.521388
Equipment Cost	47.2917	39.0919	-8.19979	-0.209757		Equipment Cost	2837.5	2345.51	-491.987	-0.209757		Equipment Cost	885300	731800	-153500	-0.209757
Consumable Cost	236.373	296.948	60.5756	0.203994		Consumable Cost	14182.4	17816.9	3634.54	0.203994		Consumable Cost	4.4249e+06	5.55887e+06	1.13398e+06	0.203994
Learning Cost	0.674926	2.00197	1.32705	0.662869		Learning Cost	40.4956	120.118	79.6228	0.662869		Learning Cost	12634.6	37476.9	24842.3	0.662869
Misuse Cost	0.00530849	0.0213609	0.0160525	0.751486		Misuse Cost	0.31851	1.28166	0.963147	0.751486		Misuse Cost	99.375	399.877	300.502	0.751486
Storage space cost	0.0251923	0.125962	0.100769	0.8		Storage space cost	1.51154	7.55769	6.04615	0.8		Storage space cost	471.6	2358	1886.4	0.8
Total	302.468	376.003	73.535	0.19557		Total	18148.1	22560.2	4412.1	0.19557		Total	5.66219e+06	7.03877e+06	1.37658e+06	0.19557
25 devices	CDDS service volume per day (person-times)	SPDDS service volume per day (person-times)				25 devices	CDDS service volume per day (person-times)	SPDDS service volume per day (person-times)				25 devices	CDDS service volume per day (person-times)	SPDDS service volume per day (person-times)
daily service volume (person-times)	75	75		Cost savings		daily service volume (person-times)	75	75		Cost savings		daily service volume (person-times)	75	75		Cost savings
Cost Composition	CDDS single treatment cost	SPDDS single treatment cost	CDDS Single Treatment Cost Savings	Reduction		Cost Composition	CDDS cost per day of treatment	SPDDS cost per day of treatment	CDDS Cost Savings per day of treatmen	Reduction		Cost Composition	CDDS Cost per year of treatment	SPDDS Cost per year of treatment	CDDS Cost Savings per year of treatment	Reduction
Labor Cost	18.0734	37.8132	19.7398	0.522035		Labor Cost	1355.5	2835.99	1480.49	0.522035		Labor Cost	422917	884828	461911	0.522035
Equipment Cost	44.4573	39.0919	-5.36538	-0.137251		Equipment Cost	3334.29	2931.89	-402.404	-0.137251		Equipment Cost	1040300	914750	-125550	-0.137251
Consumable Cost	236.012	296.948	60.9364	0.205209		Consumable Cost	17700.9	22271.1	4570.23	0.205209		Consumable Cost	5.52268e+06	6.94859e+06	1.42591e+06	0.205209
Learning Cost	0.674926	2.00197	1.32705	0.662869		Learning Cost	50.6195	150.148	99.5285	0.662869		Learning Cost	15793.3	46846.2	31052.9	0.662869
Misuse Cost	0.00530849	0.0213609	0.0160525	0.751486		Misuse Cost	0.398137	1.60207	1.20393	0.751486		Misuse Cost	124.219	499.846	375.627	0.751486
Storage space cost	0.0201538	0.100769	0.0806154	0.8		Storage space cost	1.51154	7.55769	6.04615	0.8		Storage space cost	471.6	2358	1886.4	0.8
Total	299.243	375.978	76.7345	0.204093		Total	22443.2	28198.3	5755.09	0.204093		Total	7.00229e+06	8.79787e+06	1.79559e+06	0.204093
30 devices	CDDS service volume per day (person-times)	SPDDS service volume per day (person-times)				30 devices	CDDS service volume per day (person-times)	SPDDS service volume per day (person-times)				30 devices	CDDS service volume per day (person-times)	SPDDS service volume per day (person-times)
daily service volume (person-times)	90	90		Cost savings		daily service volume (person-times)	90	90		Cost savings		daily service volume (person-times)	90	90		Cost savings
Cost Composition	CDDS single treatment cost	SPDDS single treatment cost	CDDS Single Treatment Cost Savings	Reduction		Cost Composition	CDDS cost per day of treatment	SPDDS cost per day of treatment	CDDS Cost Savings per day of treatmen	Reduction		Cost Composition	CDDS Cost per year of treatment	SPDDS Cost per year of treatment	CDDS Cost Savings per year of treatment	Reduction
Labor Cost	18.057	37.8132	19.7561	0.522467		Labor Cost	1625.13	3403.18	1778.05	0.522467		Labor Cost	507042	1.06179e+06	554752	0.522467
Equipment Cost	42.5677	39.0919	-3.47578	-0.0889132		Equipment Cost	3831.09	3518.27	-312.821	-0.0889132		Equipment Cost	1195300	1097700	-97600	-0.0889132
Consumable Cost	235.024	296.948	61.9248	0.208537		Consumable Cost	21152.1	26725.4	5573.23	0.208537		Consumable Cost	6.59946e+06	8.33831e+06	1.73885e+06	0.208537
Learning Cost	0.674926	2.00197	1.32705	0.662869		Learning Cost	60.7433	180.178	119.434	0.662869		Learning Cost	18951.9	56215.4	37263.5	0.662869
Misuse Cost	0.00530849	0.0213609	0.0160525	0.751486		Misuse Cost	0.477764	1.92249	1.44472	0.751486		Misuse Cost	149.062	599.815	450.753	0.751486
Storage space cost	0.0167949	0.0839744	0.0671795	0.8		Storage space cost	1.51154	7.55769	6.04615	0.8		Storage space cost	471.6	2358	1886.4	0.8
Total	296.345	375.961	79.6154	0.211765		Total	26671.1	33836.5	7165.38	0.211765		Total	8.32138e+06	1.0557e+07	2.2356e+06	0.211765
35 devices	CDDS service volume per day (person-times)	SPDDS service volume per day (person-times)				35 devices	CDDS service volume per day (person-times)	SPDDS service volume per day (person-times)				35 devices	CDDS service volume per day (person-times)	SPDDS service volume per day (person-times)
daily service volume (person-times)	105	105		Cost savings		daily service volume (person-times)	105	105		Cost savings		daily service volume (person-times)	105	105		Cost savings
Cost Composition	CDDS single treatment cost	SPDDS single treatment cost	CDDS Single Treatment Cost Savings	Reduction		Cost Composition	CDDS cost per day of treatment	SPDDS cost per day of treatment	CDDS Cost Savings per day of treatmen	Reduction		Cost Composition	CDDS Cost per year of treatment	SPDDS Cost per year of treatment	CDDS Cost Savings per year of treatment	Reduction
Labor Cost	18.0454	37.8132	19.7678	0.522775		Labor Cost	1894.76	3970.38	2075.62	0.522775		Labor Cost	591167	1.23876e+06	647593	0.522775
Equipment Cost	41.2179	39.0919	-2.12607	-0.0543864		Equipment Cost	4327.88	4104.65	-223.237	-0.0543864		Equipment Cost	1350300	1280650	-69650	-0.0543864
Consumable Cost	234.959	296.948	61.9897	0.208756		Consumable Cost	24670.7	31179.6	6508.92	0.208756		Consumable Cost	7.69724e+06	9.72803e+06	2.03078e+06	0.208756
Learning Cost	0.674926	2.00197	1.32705	0.662869		Learning Cost	70.8672	210.207	139.34	0.662869		Learning Cost	22110.6	65584.6	43474	0.662869
Misuse Cost	0.00530849	0.0213609	0.0160525	0.751486		Misuse Cost	0.557392	2.2429	1.68551	0.751486		Misuse Cost	173.906	699.785	525.878	0.751486
Storage space cost	0.0143956	0.071978	0.0575824	0.8		Storage space cost	1.51154	7.55769	6.04615	0.8		Storage space cost	471.6	2358	1886.4	0.8
Total	294.917	375.949	81.0321	0.21554		Total	30966.2	39474.6	8508.37	0.21554		Total	9.66147e+06	1.23161e+07	2.65461e+06	0.21554
40 devices	CDDS service volume per day (person-times)	SPDDS service volume per day (person-times)				40 devices	CDDS service volume per day (person-times)	SPDDS service volume per day (person-times)				40 devices	CDDS service volume per day (person-times)	SPDDS service volume per day (person-times)
daily service volume (person-times)	120	120		Cost savings		daily service volume (person-times)	120	120		Cost savings		daily service volume (person-times)	120	120		Cost savings
Cost Composition	CDDS single treatment cost	SPDDS single treatment cost	CDDS Single Treatment Cost Savings	Reduction		Cost Composition	CDDS cost per day of treatment	SPDDS cost per day of treatment	CDDS Cost Savings per day of treatmen	Reduction		Cost Composition	CDDS Cost per year of treatment	SPDDS Cost per year of treatment	CDDS Cost Savings per year of treatment	Reduction
Labor Cost	18.0366	37.8132	19.7765	0.523006		Labor Cost	2164.4	4537.58	2373.18	0.523006		Labor Cost	675292	1.41572e+06	740433	0.523006
Equipment Cost	40.2057	39.0919	-1.11378	-0.0284914		Equipment Cost	4824.68	4691.03	-133.654	-0.0284914		Equipment Cost	1505300	1463600	-41700	-0.0284914
Consumable Cost	234.349	296.948	62.5993	0.210809		Consumable Cost	28121.9	35633.8	7511.92	0.210809		Consumable Cost	8.77403e+06	1.11177e+07	2.34372e+06	0.210809
Learning Cost	0.674926	2.00197	1.32705	0.662869		Learning Cost	80.9911	240.237	159.246	0.662869		Learning Cost	25269.2	74953.8	49684.6	0.662869
Misuse Cost	0.00530849	0.0213609	0.0160525	0.751486		Misuse Cost	0.637019	2.56331	1.92629	0.751486		Misuse Cost	198.75	799.754	601.004	0.751486
Storage space cost	0.0125962	0.0629808	0.0503846	0.8		Storage space cost	1.51154	7.55769	6.04615	0.8		Storage space cost	471.6	2358	1886.4	0.8
Total	293.284	375.94	82.6556	0.219864		Total	35194.1	45112.8	9918.67	0.219864		Total	1.09806e+07	1.40752e+07	3.09462e+06	0.219864
45 devices	CDDS service volume per day (person-times)	SPDDS service volume per day (person-times)				45 devices	CDDS service volume per day (person-times)	SPDDS service volume per day (person-times)				45 devices	CDDS service volume per day (person-times)	SPDDS service volume per day (person-times)
daily service volume (person-times)	135	135		Cost savings		daily service volume (person-times)	135	135		Cost savings		daily service volume (person-times)	135	135		Cost savings
Cost Composition	CDDS single treatment cost	SPDDS single treatment cost	CDDS Single Treatment Cost Savings	Reduction		Cost Composition	CDDS cost per day of treatment	SPDDS cost per day of treatment	CDDS Cost Savings per day of treatmen	Reduction		Cost Composition	CDDS Cost per year of treatment	SPDDS Cost per year of treatment	CDDS Cost Savings per year of treatment	Reduction
Labor Cost	18.0298	37.8132	19.7833	0.523186		Labor Cost	2434.03	5104.78	2670.75	0.523186		Labor Cost	759417	1.59269e+06	833274	0.523186
Equipment Cost	39.4183	39.0919	-0.326448	-0.00835079		Equipment Cost	5321.47	5277.4	-44.0705	-0.00835079		Equipment Cost	1660300	1646550	-13750	-0.00835079
Consumable Cost	234.373	296.948	62.5749	0.210727		Consumable Cost	31640.4	40088	8447.61	0.210727		Consumable Cost	9.87181e+06	1.25075e+07	2.63566e+06	0.210727
Learning Cost	0.674926	2.00197	1.32705	0.662869		Learning Cost	91.115	270.266	179.151	0.662869		Learning Cost	28427.9	84323.1	55895.2	0.662869
Misuse Cost	0.00530849	0.0213609	0.0160525	0.751486		Misuse Cost	0.716647	2.88373	2.16708	0.751486		Misuse Cost	223.594	899.723	676.129	0.751486
Storage space cost	0.0111966	0.0559829	0.0447863	0.8		Storage space cost	1.51154	7.55769	6.04615	0.8		Storage space cost	471.6	2358	1886.4	0.8
Total	292.513	375.933	83.4197	0.221901		Total	39489.3	50750.9	11261.7	0.221901		Total	1.23206e+07	1.58343e+07	3.51364e+06	0.221901
50 devices	CDDS service volume per day (person-times)	SPDDS service volume per day (person-times)				50 devices	CDDS service volume per day (person-times)	SPDDS service volume per day (person-times)				50 devices	CDDS service volume per day (person-times)	SPDDS service volume per day (person-times)
daily service volume (person-times)	150	150		Cost savings		daily service volume (person-times)	150	150		Cost savings		daily service volume (person-times)	150	150		Cost savings
Cost Composition	CDDS single treatment cost	SPDDS single treatment cost	CDDS Single Treatment Cost Savings	Reduction		Cost Composition	CDDS cost per day of treatment	SPDDS cost per day of treatment	CDDS Cost Savings per day of treatmen	Reduction		Cost Composition	CDDS Cost per year of treatment	SPDDS Cost per year of treatment	CDDS Cost Savings per year of treatment	Reduction
Labor Cost	18.0244	37.8132	19.7888	0.52333		Labor Cost	2703.66	5671.97	2968.32	0.52333		Labor Cost	843542	1.76966e+06	926114	0.52333
Equipment Cost	38.7885	39.0919	0.303419	0.00776168		Equipment Cost	5818.27	5863.78	45.5128	0.00776168		Equipment Cost	1815300	1829500	14200	0.00776168
Consumable Cost	233.944	296.948	63.0041	0.212172		Consumable Cost	35091.6	44542.3	9450.61	0.212172		Consumable Cost	1.09486e+07	1.38972e+07	2.94859e+06	0.212172
Learning Cost	0.674926	2.00197	1.32705	0.662869		Learning Cost	101.239	300.296	199.057	0.662869		Learning Cost	31586.5	93692.3	62105.8	0.662869
Misuse Cost	0.00530849	0.0213609	0.0160525	0.751486		Misuse Cost	0.796274	3.20414	2.40787	0.751486		Misuse Cost	248.438	999.692	751.255	0.751486
Storage space cost	0.0100769	0.0503846	0.0403077	0.8		Storage space cost	1.51154	7.55769	6.04615	0.8		Storage space cost	471.6	2358	1886.4	0.8
Total	291.447	375.927	84.4797	0.224724		Total	43717.1	56389.1	12672	0.224724		Total	1.36397e+07	1.75934e+07	3.95365e+06	0.224724
Scenario 3
5 devices	CDDS service volume per day (person-times)	SPDDS service volume per day (person-times)				5 devices	CDDS service volume per day (person-times)	SPDDS service volume per day (person-times)				5 devices	CDDS service volume per day (person-times)	SPDDS service volume per day (person-times)
daily service volume (person-times)	10	10		No cost savings		daily service volume (person-times)	10	10		No cost savings		daily service volume (person-times)	10	10		No cost savings
Cost Composition	CDDS single treatment cost	SPDDS single treatment cost	CDDS Single Treatment Cost Savings	Reduction		Cost Composition	CDDS cost per day of treatment	SPDDS cost per day of treatment	CDDS Cost Savings per day of treatmen	Reduction		Cost Composition	CDDS Cost per year of treatment	SPDDS Cost per year of treatment	CDDS Cost Savings per year of treatment	Reduction
Labor Cost	18.7099	37.8132	19.1032	0.5052		Labor Cost	187.099	378.132	191.032	0.5052		Labor Cost	58375	117977	59602.1	0.5052
Equipment Cost	134.845	44.4925	-90.352	-2.03072		Equipment Cost	1348.45	444.925	-903.52	-2.03072		Equipment Cost	420715	138817	-281898	-2.03072
Consumable Cost	261.097	276.032	14.9346	0.0541045		Consumable Cost	2610.97	2760.32	149.346	0.0541045		Consumable Cost	814623	861219	46595.8	0.0541045
Learning Cost	0.674926	2.00197	1.32705	0.662869		Learning Cost	6.74926	20.0197	13.2705	0.662869		Learning Cost	2105.77	6246.15	4140.38	0.662869
Misuse Cost	0.00530849	0.0213609	0.0160525	0.751486		Misuse Cost	0.0530849	0.213609	0.160525	0.751486		Misuse Cost	16.5625	66.6462	50.0837	0.751486
Storage space cost	0.151154	0.755769	0.604615	0.8		Storage space cost	1.51154	7.55769	6.04615	0.8		Storage space cost	471.6	2358	1886.4	0.8
Total	415.483	361.116	-54.3665	-0.150551		Total	4154.83	3611.16	-543.665	-0.150551		Total	1.29631e+06	1.12668e+06	-169624	-0.150551
直接成本	414.652	358.337	-56.3142	-0.157154		直接成本	4146.52	3705.03	-441.488	-0.119159		直接成本	1.29371e+06	1.09202e+06	-201693	-0.184698
间接成本	0.831388	2.7791	1.94771	0.700843		间接成本	8.31388	27.791	19.4771	0.700843		间接成本	2593.93	8670.8	1936.48	0.223334
6 devices	CDDS service volume per day (person-times)	SPDDS service volume per day (person-times)				6 devices	CDDS service volume per day (person-times)	SPDDS service volume per day (person-times)				6 devices	CDDS service volume per day (person-times)	SPDDS service volume per day (person-times)
daily service volume (person-times)	12	12		No cost savings		daily service volume (person-times)	12	12		No cost savings		daily service volume (person-times)	12	12		No cost savings
Cost Composition	CDDS single treatment cost	SPDDS single treatment cost	CDDS Single Treatment Cost Savings	Reduction		Cost Composition	CDDS cost per day of treatment	SPDDS cost per day of treatment	CDDS Cost Savings per day of treatmen	Reduction		Cost Composition	CDDS Cost per year of treatment	SPDDS Cost per year of treatment	CDDS Cost Savings per year of treatment	Reduction
Labor Cost	18.5875	37.8132	19.2256	0.508438		Labor Cost	223.05	453.758	230.708	0.508438		Labor Cost	69591.7	141572	71980.8	0.508438
Equipment Cost	120.673	44.4925	-76.18	-1.7122		Equipment Cost	1448.07	533.91	-914.16	-1.7122		Equipment Cost	451798	166580	-285218	-1.7122
Consumable Cost	255.928	276.032	20.1038	0.0728315		Consumable Cost	3071.13	3312.38	241.246	0.0728315		Consumable Cost	958194	1.03346e+06	75268.6	0.0728315
Learning Cost	0.674926	2.00197	1.32705	0.662869		Learning Cost	8.09911	24.0237	15.9246	0.662869		Learning Cost	2526.92	7495.38	4968.46	0.662869
Misuse Cost	0.00530849	0.0213609	0.0160525	0.751486		Misuse Cost	0.0637019	0.256331	0.192629	0.751486		Misuse Cost	19.875	79.9754	60.1004	0.751486
Storage space cost	0.125962	0.629808	0.503846	0.8		Storage space cost	1.51154	7.55769	6.04615	0.8		Storage space cost	471.6	2358	1886.4	0.8
Total	395.994	360.991	-35.0036	-0.0969655		Total	4751.93	4331.89	-420.044	-0.0969655		Total	1.4826e+06	1.35155e+06	-131054	-0.0969655
直接成本	395.188	358.337	-36.8506	-0.102838		直接成本	4742.26	4446.03	-296.222	-0.0666262		直接成本	1.47958e+06	1.31042e+06	-169160	-0.129088
间接成本	0.806196	2.65314	1.84694	0.696135		间接成本	9.67435	31.8377	22.1633	0.696135		间接成本	3018.4	9933.36	1946.5	0.195956
7 devices	CDDS service volume per day (person-times)	SPDDS service volume per day (person-times)				7 devices	CDDS service volume per day (person-times)	SPDDS service volume per day (person-times)				7 devices	CDDS service volume per day (person-times)	SPDDS service volume per day (person-times)
daily service volume (person-times)	14	14		No cost savings		daily service volume (person-times)	14	14		No cost savings		daily service volume (person-times)	14	14		No cost savings
Cost Composition	CDDS single treatment cost	SPDDS single treatment cost	CDDS Single Treatment Cost Savings	Reduction		Cost Composition	CDDS cost per day of treatment	SPDDS cost per day of treatment	CDDS Cost Savings per day of treatmen	Reduction		Cost Composition	CDDS Cost per year of treatment	SPDDS Cost per year of treatment	CDDS Cost Savings per year of treatment	Reduction
Labor Cost	18.5001	37.8132	19.3131	0.51075		Labor Cost	259.001	529.384	270.383	0.51075		Labor Cost	80808.3	165168	84359.6	0.51075
Equipment Cost	110.55	44.4925	-66.0572	-1.48468		Equipment Cost	1547.7	622.895	-924.8	-1.48468		Equipment Cost	482881	194343	-288538	-1.48468
Consumable Cost	252.236	276.032	23.7961	0.0862079		Consumable Cost	3531.3	3864.44	333.146	0.0862079		Consumable Cost	1.10176e+06	1.20571e+06	103941	0.0862079
Learning Cost	0.674926	2.00197	1.32705	0.662869		Learning Cost	9.44896	28.0276	18.5786	0.662869		Learning Cost	2948.08	8744.62	5796.54	0.662869
Misuse Cost	0.00530849	0.0213609	0.0160525	0.751486		Misuse Cost	0.0743189	0.299053	0.224734	0.751486		Misuse Cost	23.1875	93.3046	70.1171	0.751486
Storage space cost	0.107967	0.539835	0.431868	0.8		Storage space cost	1.51154	7.55769	6.04615	0.8		Storage space cost	471.6	2358	1886.4	0.8
Total	382.074	360.901	-21.173	-0.0586671		Total	5349.03	5052.61	-296.422	-0.0586671		Total	1.6689e+06	1.57641e+06	-92483.6	-0.0586671
直接成本	381.285	358.337	-22.948	-0.0640401		直接成本	5337.99	5187.04	-150.956	-0.0291025		直接成本	1.66545e+06	1.52883e+06	-136627	-0.089367
间接成本	0.788202	2.56317	1.77497	0.692489		间接成本	11.0348	35.8844	24.8495	0.692489		间接成本	3442.86	11195.9	1956.52	0.174753
8 devices	CDDS service volume per day (person-times)	SPDDS service volume per day (person-times)				8 devices	CDDS service volume per day (person-times)	SPDDS service volume per day (person-times)				8 devices	CDDS service volume per day (person-times)	SPDDS service volume per day (person-times)
daily service volume (person-times)	16	16		No cost savings		daily service volume (person-times)	16	16		No cost savings		daily service volume (person-times)	16	16		No cost savings
Cost Composition	CDDS single treatment cost	SPDDS single treatment cost	CDDS Single Treatment Cost Savings	Reduction		Cost Composition	CDDS cost per day of treatment	SPDDS cost per day of treatment	CDDS Cost Savings per day of treatmen	Reduction		Cost Composition	CDDS Cost per year of treatment	SPDDS Cost per year of treatment	CDDS Cost Savings per year of treatment	Reduction
Labor Cost	18.4345	37.8132	19.3787	0.512485		Labor Cost	294.952	605.011	310.059	0.512485		Labor Cost	92025	188763	96738.3	0.512485
Equipment Cost	102.958	44.4925	-58.465	-1.31404		Equipment Cost	1647.32	711.88	-935.44	-1.31404		Equipment Cost	513964	222107	-291857	-1.31404
Consumable Cost	249.466	276.032	26.5653	0.0962402		Consumable Cost	3991.46	4416.51	425.046	0.0962402		Consumable Cost	1.24534e+06	1.37795e+06	132614	0.0962402
Learning Cost	0.674926	2.00197	1.32705	0.662869		Learning Cost	10.7988	32.0316	21.2327	0.662869		Learning Cost	3369.23	9993.85	6624.62	0.662869
Misuse Cost	0.00530849	0.0213609	0.0160525	0.751486		Misuse Cost	0.0849359	0.341775	0.256839	0.751486		Misuse Cost	26.5	106.634	80.1338	0.751486
Storage space cost	0.0944712	0.472356	0.377885	0.8		Storage space cost	1.51154	7.55769	6.04615	0.8		Storage space cost	471.6	2358	1886.4	0.8
Total	371.633	360.833	-10.8	-0.0299308		Total	5946.13	5773.33	-172.8	-0.0299308		Total	1.85519e+06	1.80128e+06	-53913.6	-0.0299308
直接成本	370.858	358.337	-12.521	-0.0349419		直接成本	5933.73	5928.04	-5.68974	-0.0009598		直接成本	1.85132e+06	1.74723e+06	-104094	-0.0595763
间接成本	0.774706	2.49569	1.72098	0.689582		间接成本	12.3953	39.931	27.5357	0.689582		间接成本	3867.33	12458.5	1966.53	0.157847
9 devices	CDDS service volume per day (person-times)	SPDDS service volume per day (person-times)				9 devices	CDDS service volume per day (person-times)	SPDDS service volume per day (person-times)				9 devices	CDDS service volume per day (person-times)	SPDDS service volume per day (person-times)
daily service volume (person-times)	18	18		No cost savings		daily service volume (person-times)	18	18		No cost savings		daily service volume (person-times)	18	18		No cost savings
Cost Composition	CDDS single treatment cost	SPDDS single treatment cost	CDDS Single Treatment Cost Savings	Reduction		Cost Composition	CDDS cost per day of treatment	SPDDS cost per day of treatment	CDDS Cost Savings per day of treatmen	Reduction		Cost Composition	CDDS Cost per year of treatment	SPDDS Cost per year of treatment	CDDS Cost Savings per year of treatment	Reduction
Labor Cost	18.3835	37.8132	19.4297	0.513834		Labor Cost	330.903	680.637	349.734	0.513834		Labor Cost	103242	212359	109117	0.513834
Equipment Cost	97.0525	44.4925	-52.56	-1.18132		Equipment Cost	1746.95	800.865	-946.08	-1.18132		Equipment Cost	545047	249870	-295177	-1.18132
Consumable Cost	247.312	276.032	28.7192	0.104043		Consumable Cost	4451.62	4968.57	516.946	0.104043		Consumable Cost	1.38891e+06	1.55019e+06	161287	0.104043
Learning Cost	0.674926	2.00197	1.32705	0.662869		Learning Cost	12.1487	36.0355	23.8868	0.662869		Learning Cost	3790.38	11243.1	7452.69	0.662869
Misuse Cost	0.00530849	0.0213609	0.0160525	0.751486		Misuse Cost	0.0955529	0.384497	0.288944	0.751486		Misuse Cost	29.8125	119.963	90.1506	0.751486
Storage space cost	0.0839744	0.419872	0.335897	0.8		Storage space cost	1.51154	7.55769	6.04615	0.8		Storage space cost	471.6	2358	1886.4	0.8
Total	363.513	360.781	-2.73214	-0.00757285		Total	6543.23	6494.05	-49.1785	-0.00757285		Total	2.04149e+06	2.02614e+06	-15343.7	-0.00757285
直接成本	362.749	358.337	-4.41113	-0.01231		直接成本	6529.47	6669.05	139.577	0.020929		直接成本	2.0372e+06	1.96564e+06	-71560.2	-0.0364056
间接成本	0.764209	2.44321	1.679	0.687211		间接成本	13.7558	43.9777	30.2219	0.687211		间接成本	4291.8	13721	1976.55	0.144053
10 devices	CDDS service volume per day (person-times)	SPDDS service volume per day (person-times)				10 devices	CDDS service volume per day (person-times)	SPDDS service volume per day (person-times)				10 devices	CDDS service volume per day (person-times)	SPDDS service volume per day (person-times)
daily service volume (person-times)	20	20		Cost savings		daily service volume (person-times)	20	20		Cost savings		daily service volume (person-times)	20	20		Cost savings
Cost Composition	CDDS single treatment cost	SPDDS single treatment cost	CDDS Single Treatment Cost Savings	Reduction		Cost Composition	CDDS cost per day of treatment	SPDDS cost per day of treatment	CDDS Cost Savings per day of treatmen	Reduction		Cost Composition	CDDS Cost per year of treatment	SPDDS Cost per year of treatment	CDDS Cost Savings per year of treatment	Reduction
Labor Cost	18.3427	37.8132	19.4705	0.514913		Labor Cost	366.854	756.263	389.41	0.514913		Labor Cost	114458	235954	121496	0.514913
Equipment Cost	92.3285	44.4925	-47.836	-1.07515		Equipment Cost	1846.57	889.85	-956.72	-1.07515		Equipment Cost	576130	277633	-298497	-1.07515
Consumable Cost	245.589	276.032	30.4423	0.110285		Consumable Cost	4911.79	5520.63	608.845	0.110285		Consumable Cost	1.53248e+06	1.72244e+06	189960	0.110285
Learning Cost	0.674926	2.00197	1.32705	0.662869		Learning Cost	13.4985	40.0394	26.5409	0.662869		Learning Cost	4211.54	12492.3	8280.77	0.662869
Misuse Cost	0.00530849	0.0213609	0.0160525	0.751486		Misuse Cost	0.10617	0.427219	0.321049	0.751486		Misuse Cost	33.125	133.292	100.167	0.751486
Storage space cost	0.0755769	0.377885	0.302308	0.8		Storage space cost	1.51154	7.55769	6.04615	0.8		Storage space cost	471.6	2358	1886.4	0.8
Total	357.016	360.739	3.72216	0.0103182		Total	7140.33	7214.77	74.4432	0.0103182		Total	2.22778e+06	2.25101e+06	23226.3	0.0103182
直接成本	356.261	358.337	2.07675	0.00579553		直接成本	7125.21	7410.06	284.843	0.03844		直接成本	2.22307e+06	2.18404e+06	-39026.9	-0.0178692
间接成本	0.755811	2.40122	1.64541	0.685238		间接成本	15.1162	48.0244	32.9081	0.685238		间接成本	4716.26	14983.6	1986.57	0.132583
11 devices	CDDS service volume per day (person-times)	SPDDS service volume per day (person-times)				11 devices	CDDS service volume per day (person-times)	SPDDS service volume per day (person-times)				11 devices	CDDS service volume per day (person-times)	SPDDS service volume per day (person-times)
daily service volume (person-times)	22	22		Cost savings		daily service volume (person-times)	22	22		Cost savings		daily service volume (person-times)	22	22		Cost savings
Cost Composition	CDDS single treatment cost	SPDDS single treatment cost	CDDS Single Treatment Cost Savings	Reduction		Cost Composition	CDDS cost per day of treatment	SPDDS cost per day of treatment	CDDS Cost Savings per day of treatmen	Reduction		Cost Composition	CDDS Cost per year of treatment	SPDDS Cost per year of treatment	CDDS Cost Savings per year of treatment	Reduction
Labor Cost	18.3093	37.8132	19.5039	0.515796		Labor Cost	402.804	831.89	429.085	0.515796		Labor Cost	125675	259550	133875	0.515796
Equipment Cost	88.4634	44.4925	-43.9709	-0.988276		Equipment Cost	1946.2	978.835	-967.36	-0.988276		Equipment Cost	607213	305397	-301816	-0.988276
Consumable Cost	244.18	276.032	31.8521	0.115393		Consumable Cost	5371.95	6072.7	700.745	0.115393		Consumable Cost	1.67605e+06	1.89468e+06	218633	0.115393
Learning Cost	0.674926	2.00197	1.32705	0.662869		Learning Cost	14.8484	44.0434	29.195	0.662869		Learning Cost	4632.69	13741.5	9108.85	0.662869
Misuse Cost	0.00530849	0.0213609	0.0160525	0.751486		Misuse Cost	0.116787	0.469941	0.353154	0.751486		Misuse Cost	36.4375	146.622	110.184	0.751486
Storage space cost	0.0687063	0.343531	0.274825	0.8		Storage space cost	1.51154	7.55769	6.04615	0.8		Storage space cost	471.6	2358	1886.4	0.8
Total	351.701	360.704	9.00295	0.0249594		Total	7737.43	7935.49	198.065	0.0249594		Total	2.41408e+06	2.47587e+06	61796.2	0.0249594
直接成本	350.952	358.337	7.38449	0.0206077		直接成本	7720.95	8151.05	430.097	0.0527659		直接成本	2.40894e+06	2.40244e+06	-6497.32	-0.00270447
间接成本	0.748941	2.36686	1.61792	0.683573		间接成本	16.4767	52.071	35.5943	0.683573		间接成本	5140.73	16246.2	1996.58	0.122896
12 devices	CDDS service volume per day (person-times)	SPDDS service volume per day (person-times)				12 devices	CDDS service volume per day (person-times)	SPDDS service volume per day (person-times)				12 devices	CDDS service volume per day (person-times)	SPDDS service volume per day (person-times)
daily service volume (person-times)	24	24		Cost savings		daily service volume (person-times)	24	24		Cost savings		daily service volume (person-times)	24	24		Cost savings
Cost Composition	CDDS single treatment cost	SPDDS single treatment cost	CDDS Single Treatment Cost Savings	Reduction		Cost Composition	CDDS cost per day of treatment	SPDDS cost per day of treatment	CDDS Cost Savings per day of treatmen	Reduction		Cost Composition	CDDS Cost per year of treatment	SPDDS Cost per year of treatment	CDDS Cost Savings per year of treatment	Reduction
Labor Cost	18.2815	37.8132	19.5317	0.516532		Labor Cost	438.755	907.516	468.761	0.516532		Labor Cost	136892	283145	146253	0.516532
Equipment Cost	85.2425	44.4925	-40.75	-0.915884		Equipment Cost	2045.82	1067.82	-978	-0.915884		Equipment Cost	638296	333160	-305136	-0.915884
Consumable Cost	243.005	276.032	33.0269	0.119649		Consumable Cost	5832.12	6624.76	792.645	0.119649		Consumable Cost	1.81962e+06	2.06693e+06	247305	0.119649
Learning Cost	0.674926	2.00197	1.32705	0.662869		Learning Cost	16.1982	48.0473	31.8491	0.662869		Learning Cost	5053.85	14990.8	9936.92	0.662869
Misuse Cost	0.00530849	0.0213609	0.0160525	0.751486		Misuse Cost	0.127404	0.512663	0.385259	0.751486		Misuse Cost	39.75	159.951	120.201	0.751486
Storage space cost	0.0629808	0.314904	0.251923	0.8		Storage space cost	1.51154	7.55769	6.04615	0.8		Storage space cost	471.6	2358	1886.4	0.8
Total	347.272	360.676	13.4036	0.0371625		Total	8334.53	8656.21	321.687	0.0371625		Total	2.60037e+06	2.70074e+06	100366	0.0371625
直接成本	346.529	358.337	11.8086	0.0329538		直接成本	8316.69	8600.1	283.406	0.0329538		直接成本	2.59481e+06	2.68323e+06	88422.7	0.0329538
间接成本	0.743215	2.33824	1.59502	0.682147		间接成本	17.8372	56.1177	38.2805	0.682147		间接成本	5565.2	17508.7	11943.5	0.682147
15 devices	CDDS service volume per day (person-times)	SPDDS service volume per day (person-times)				15 devices	CDDS service volume per day (person-times)	SPDDS service volume per day (person-times)				15 devices	CDDS service volume per day (person-times)	SPDDS service volume per day (person-times)
daily service volume (person-times)	30	30		Cost savings		daily service volume (person-times)	30	30		Cost savings		daily service volume (person-times)	30	30		Cost savings
Cost Composition	CDDS single treatment cost	SPDDS single treatment cost	CDDS Single Treatment Cost Savings	Reduction		Cost Composition	CDDS cost per day of treatment	SPDDS cost per day of treatment	CDDS Cost Savings per day of treatmen	Reduction		Cost Composition	CDDS Cost per year of treatment	SPDDS Cost per year of treatment	CDDS Cost Savings per year of treatment	Reduction
Labor Cost	18.2203	37.8132	19.5929	0.51815		Labor Cost	546.608	1134.39	587.787	0.51815		Labor Cost	170542	353931	183390	0.51815
Equipment Cost	78.1565	44.4925	-33.664	-0.756621		Equipment Cost	2344.7	1334.78	-1009.92	-0.756621		Equipment Cost	731545	416450	-315095	-0.756621
Consumable Cost	240.42	276.032	35.6115	0.129012		Consumable Cost	7212.61	8280.95	1068.35	0.129012		Consumable Cost	2.25033e+06	2.58366e+06	333324	0.129012
Learning Cost	0.674926	2.00197	1.32705	0.662869		Learning Cost	20.2478	60.0592	39.8114	0.662869		Learning Cost	6317.31	18738.5	12421.2	0.662869
Misuse Cost	0.00530849	0.0213609	0.0160525	0.751486		Misuse Cost	0.159255	0.640828	0.481574	0.751486		Misuse Cost	49.6875	199.938	150.251	0.751486
Storage space cost	0.0503846	0.251923	0.201538	0.8		Storage space cost	1.51154	7.55769	6.04615	0.8		Storage space cost	471.6	2358	1886.4	0.8
Total	337.528	360.613	23.0851	0.0640162		Total	10125.8	10818.4	692.552	0.0640162		Total	3.15926e+06	3.37533e+06	216076	0.0640162
直接成本	336.797	358.337	21.5399	0.0601107		直接成本	10103.9	11115.1	1011.16	0.0909718		直接成本	3.15242e+06	3.27605e+06	123634	0.0377388
间接成本	0.730619	2.27526	1.54464	0.678885		间接成本	21.9186	68.2577	46.3391	0.678885		间接成本	6838.6	21296.4	2036.65	0.0956336
20 devices	CDDS service volume per day (person-times)	SPDDS service volume per day (person-times)				20 devices	CDDS service volume per day (person-times)	SPDDS service volume per day (person-times)				20 devices	CDDS service volume per day (person-times)	SPDDS service volume per day (person-times)
daily service volume (person-times)	40	40		Cost savings		daily service volume (person-times)	40	40		Cost savings		daily service volume (person-times)	40	40		Cost savings
Cost Composition	CDDS single treatment cost	SPDDS single treatment cost	CDDS Single Treatment Cost Savings	Reduction		Cost Composition	CDDS cost per day of treatment	SPDDS cost per day of treatment	CDDS Cost Savings per day of treatmen	Reduction		Cost Composition	CDDS Cost per year of treatment	SPDDS Cost per year of treatment	CDDS Cost Savings per year of treatment	Reduction
Labor Cost	18.1591	37.8132	19.6541	0.519769		Labor Cost	726.362	1512.53	786.164	0.519769		Labor Cost	226625	471908	245283	0.519769
Equipment Cost	71.0705	44.4925	-26.578	-0.597359		Equipment Cost	2842.82	1779.7	-1063.12	-0.597359		Equipment Cost	886960	555267	-331693	-0.597359
Consumable Cost	239.518	276.032	36.5134	0.13228		Consumable Cost	9580.73	11041.3	1460.54	0.13228		Consumable Cost	2.98919e+06	3.44488e+06	455688	0.13228
Learning Cost	0.674926	2.00197	1.32705	0.662869		Learning Cost	26.997	80.0789	53.0819	0.662869		Learning Cost	8423.08	24984.6	16561.5	0.662869
Misuse Cost	0.00530849	0.0213609	0.0160525	0.751486		Misuse Cost	0.21234	0.854438	0.642098	0.751486		Misuse Cost	66.25	266.585	200.335	0.751486
Storage space cost	0.0377885	0.188942	0.151154	0.8		Storage space cost	1.51154	7.55769	6.04615	0.8		Storage space cost	471.6	2358	1886.4	0.8
Total	329.466	360.55	31.0838	0.0862123		Total	13178.6	14422	1243.35	0.0862123		Total	4.11173e+06	4.49966e+06	387926	0.0862123
直接成本	328.748	358.337	29.589	0.0825732		直接成本	13149.9	14820.1	1670.18	0.112697		直接成本	4.10277e+06	4.36807e+06	265299	0.060736
间接成本	0.718023	2.21228	1.49425	0.675437		间接成本	28.7209	88.491	59.7701	0.675437		间接成本	8960.93	27609.2	2086.73	0.0755811
25 devices	CDDS service volume per day (person-times)	SPDDS service volume per day (person-times)				25 devices	CDDS service volume per day (person-times)	SPDDS service volume per day (person-times)				25 devices	CDDS service volume per day (person-times)	SPDDS service volume per day (person-times)
daily service volume (person-times)	50	50		Cost savings		daily service volume (person-times)	50	50		Cost savings		daily service volume (person-times)	50	50		Cost savings
Cost Composition	CDDS single treatment cost	SPDDS single treatment cost	CDDS Single Treatment Cost Savings	Reduction		Cost Composition	CDDS cost per day of treatment	SPDDS cost per day of treatment	CDDS Cost Savings per day of treatmen	Reduction		Cost Composition	CDDS Cost per year of treatment	SPDDS Cost per year of treatment	CDDS Cost Savings per year of treatment	Reduction
Labor Cost	18.1223	37.8132	19.6908	0.52074		Labor Cost	906.116	1890.66	984.542	0.52074		Labor Cost	282708	589885	307177	0.52074
Equipment Cost	66.8189	44.4925	-22.3264	-0.501801		Equipment Cost	3340.95	2224.63	-1116.32	-0.501801		Equipment Cost	1042375	694083	-348292	-0.501801
Consumable Cost	237.631	276.032	38.4007	0.139117		Consumable Cost	11881.5	13801.6	1920.04	0.139117		Consumable Cost	3.70704e+06	4.30609e+06	599052	0.139117
Learning Cost	0.674926	2.00197	1.32705	0.662869		Learning Cost	33.7463	100.099	66.3523	0.662869		Learning Cost	10528.8	31230.8	20701.9	0.662869
Misuse Cost	0.00530849	0.0213609	0.0160525	0.751486		Misuse Cost	0.265425	1.06805	0.802623	0.751486		Misuse Cost	82.8125	333.231	250.418	0.751486
Storage space cost	0.0302308	0.151154	0.120923	0.8		Storage space cost	1.51154	7.55769	6.04615	0.8		Storage space cost	471.6	2358	1886.4	0.8
Total	323.283	360.512	37.2292	0.103268		Total	16164.1	18025.6	1861.46	0.103268		Total	5.04321e+06	5.62399e+06	580776	0.103268
直接成本	322.572	358.337	35.7647	0.0998074		直接成本	16128.6	18525.1	2396.5	0.129365		直接成本	5.03213e+06	5.46009e+06	427964	0.0783804
间接成本	0.710465	2.17449	1.46402	0.673272		间接成本	35.5233	108.724	73.2011	0.673272		间接成本	11083.3	33922	2136.82	0.0629921
30 devices	CDDS service volume per day (person-times)	SPDDS service volume per day (person-times)				30 devices	CDDS service volume per day (person-times)	SPDDS service volume per day (person-times)				30 devices	CDDS service volume per day (person-times)	SPDDS service volume per day (person-times)
daily service volume (person-times)	60	60		Cost savings		daily service volume (person-times)	60	60		Cost savings		daily service volume (person-times)	60	60		Cost savings
Cost Composition	CDDS single treatment cost	SPDDS single treatment cost	CDDS Single Treatment Cost Savings	Reduction		Cost Composition	CDDS cost per day of treatment	SPDDS cost per day of treatment	CDDS Cost Savings per day of treatmen	Reduction		Cost Composition	CDDS Cost per year of treatment	SPDDS Cost per year of treatment	CDDS Cost Savings per year of treatment	Reduction
Labor Cost	18.0978	37.8132	19.7153	0.521388		Labor Cost	1085.87	2268.79	1182.92	0.521388		Labor Cost	338792	707862	369071	0.521388
Equipment Cost	63.9845	44.4925	-19.492	-0.438096		Equipment Cost	3839.07	2669.55	-1169.52	-0.438096		Equipment Cost	1197790	832900	-364890	-0.438096
Consumable Cost	236.373	276.032	39.659	0.143675		Consumable Cost	14182.4	16561.9	2379.54	0.143675		Consumable Cost	4.4249e+06	5.16731e+06	742416	0.143675
Learning Cost	0.674926	2.00197	1.32705	0.662869		Learning Cost	40.4956	120.118	79.6228	0.662869		Learning Cost	12634.6	37476.9	24842.3	0.662869
Misuse Cost	0.00530849	0.0213609	0.0160525	0.751486		Misuse Cost	0.31851	1.28166	0.963147	0.751486		Misuse Cost	99.375	399.877	300.502	0.751486
Storage space cost	0.0251923	0.125962	0.100769	0.8		Storage space cost	1.51154	7.55769	6.04615	0.8		Storage space cost	471.6	2358	1886.4	0.8
Total	319.161	360.487	41.3262	0.11464		Total	19149.6	21629.2	2479.57	0.11464		Total	5.97468e+06	6.74831e+06	773626	0.11464
直接成本	318.455	358.337	39.8817	0.111297		直接成本	19107.3	22230.1	3122.83	0.140477		直接成本	5.96148e+06	6.55211e+06	590629	0.0901433
间接成本	0.705427	2.14929	1.44387	0.671787		间接成本	42.3256	128.958	86.6321	0.671787		间接成本	13205.6	40234.8	2186.9	0.0543535
35 devices	CDDS service volume per day (person-times)	SPDDS service volume per day (person-times)				35 devices	CDDS service volume per day (person-times)	SPDDS service volume per day (person-times)				35 devices	CDDS service volume per day (person-times)	SPDDS service volume per day (person-times)
daily service volume (person-times)	70	70		Cost savings		daily service volume (person-times)	70	70		Cost savings		daily service volume (person-times)	70	70		Cost savings
Cost Composition	CDDS single treatment cost	SPDDS single treatment cost	CDDS Single Treatment Cost Savings	Reduction		Cost Composition	CDDS cost per day of treatment	SPDDS cost per day of treatment	CDDS Cost Savings per day of treatmen	Reduction		Cost Composition	CDDS Cost per year of treatment	SPDDS Cost per year of treatment	CDDS Cost Savings per year of treatment	Reduction
Labor Cost	18.0804	37.8132	19.7328	0.52185		Labor Cost	1265.62	2646.92	1381.3	0.52185		Labor Cost	394875	825840	430965	0.52185
Equipment Cost	61.9599	44.4925	-17.4674	-0.392592		Equipment Cost	4337.2	3114.48	-1222.72	-0.392592		Equipment Cost	1353205	971717	-381488	-0.392592
Consumable Cost	236.436	276.032	39.5961	0.143448		Consumable Cost	16550.5	19322.2	2771.73	0.143448		Consumable Cost	5.16375e+06	6.02853e+06	864780	0.143448
Learning Cost	0.674926	2.00197	1.32705	0.662869		Learning Cost	47.2448	140.138	92.8932	0.662869		Learning Cost	14740.4	43723.1	28982.7	0.662869
Misuse Cost	0.00530849	0.0213609	0.0160525	0.751486		Misuse Cost	0.371595	1.49527	1.12367	0.751486		Misuse Cost	115.938	466.523	350.586	0.751486
Storage space cost	0.0215934	0.107967	0.0863736	0.8		Storage space cost	1.51154	7.55769	6.04615	0.8		Storage space cost	471.6	2358	1886.4	0.8
Total	317.178	360.469	43.291	0.120096		Total	22202.4	25232.8	3030.37	0.120096		Total	6.92716e+06	7.87264e+06	945475	0.120096
直接成本	316.476	358.337	41.8615	0.116822		直接成本	22153.3	25083.6	2930.31	0.116822		直接成本	6.91183e+06	7.82609e+06	914256	0.116822
间接成本	0.701828	2.1313	1.42947	0.670704		间接成本	49.128	149.191	100.063	0.670704		间接成本	15327.9	46547.6	31219.7	0.670704
40 devices	CDDS service volume per day (person-times)	SPDDS service volume per day (person-times)				40 devices	CDDS service volume per day (person-times)	SPDDS service volume per day (person-times)				40 devices	CDDS service volume per day (person-times)	SPDDS service volume per day (person-times)
daily service volume (person-times)	80	80		Cost savings		daily service volume (person-times)	80	80		Cost savings		daily service volume (person-times)	80	80		Cost savings
Cost Composition	CDDS single treatment cost	SPDDS single treatment cost	CDDS Single Treatment Cost Savings	Reduction		Cost Composition	CDDS cost per day of treatment	SPDDS cost per day of treatment	CDDS Cost Savings per day of treatmen	Reduction		Cost Composition	CDDS Cost per year of treatment	SPDDS Cost per year of treatment	CDDS Cost Savings per year of treatment	Reduction
Labor Cost	18.0672	37.8132	19.7459	0.522197		Labor Cost	1445.38	3025.05	1579.67	0.522197		Labor Cost	450958	943817	492858	0.522197
Equipment Cost	60.4415	44.4925	-15.949	-0.358464		Equipment Cost	4835.32	3559.4	-1275.92	-0.358464		Equipment Cost	1508620	1.11053e+06	-398087	-0.358464
Consumable Cost	235.641	276.032	40.3904	0.146325		Consumable Cost	18851.3	22082.5	3231.23	0.146325		Consumable Cost	5.88161e+06	6.88975e+06	1.00814e+06	0.146325
Learning Cost	0.674926	2.00197	1.32705	0.662869		Learning Cost	53.9941	160.158	106.164	0.662869		Learning Cost	16846.2	49969.2	33123.1	0.662869
Misuse Cost	0.00530849	0.0213609	0.0160525	0.751486		Misuse Cost	0.424679	1.70888	1.2842	0.751486		Misuse Cost	132.5	533.169	400.669	0.751486
Storage space cost	0.0188942	0.0944712	0.0755769	0.8		Storage space cost	1.51154	7.55769	6.04615	0.8		Storage space cost	471.6	2358	1886.4	0.8
Total	314.849	360.455	45.606	0.126523		Total	25187.9	28836.4	3648.48	0.126523		Total	7.85864e+06	8.99696e+06	1.13833e+06	0.126523
直接成本	314.15	358.337	44.1868	0.123311		直接成本	25132	29640.2	4508.17	0.152097		直接成本	7.84119e+06	8.73614e+06	894958	0.102443
间接成本	0.699129	2.1178	1.41868	0.66988		间接成本	55.9303	169.424	113.494	0.66988		间接成本	17450.3	52860.4	2287.07	0.0432662
45 devices	CDDS service volume per day (person-times)	SPDDS service volume per day (person-times)				45 devices	CDDS service volume per day (person-times)	SPDDS service volume per day (person-times)				45 devices	CDDS service volume per day (person-times)	SPDDS service volume per day (person-times)
daily service volume (person-times)	90	90		Cost savings		daily service volume (person-times)	90	90		Cost savings		daily service volume (person-times)	90	90		Cost savings
Cost Composition	CDDS single treatment cost	SPDDS single treatment cost	CDDS Single Treatment Cost Savings	Reduction		Cost Composition	CDDS cost per day of treatment	SPDDS cost per day of treatment	CDDS Cost Savings per day of treatmen	Reduction		Cost Composition	CDDS Cost per year of treatment	SPDDS Cost per year of treatment	CDDS Cost Savings per year of treatment	Reduction
Labor Cost	18.057	37.8132	19.7561	0.522467		Labor Cost	1625.13	3403.18	1778.05	0.522467		Labor Cost	507042	1.06179e+06	554752	0.522467
Equipment Cost	59.2605	44.4925	-14.768	-0.331921		Equipment Cost	5333.45	4004.33	-1329.12	-0.331921		Equipment Cost	1664035	1249350	-414685	-0.331921
Consumable Cost	235.024	276.032	41.0081	0.148563		Consumable Cost	21152.1	24842.9	3690.73	0.148563		Consumable Cost	6.59946e+06	7.75097e+06	1.15151e+06	0.148563
Learning Cost	0.674926	2.00197	1.32705	0.662869		Learning Cost	60.7433	180.178	119.434	0.662869		Learning Cost	18951.9	56215.4	37263.5	0.662869
Misuse Cost	0.00530849	0.0213609	0.0160525	0.751486		Misuse Cost	0.477764	1.92249	1.44472	0.751486		Misuse Cost	149.062	599.815	450.753	0.751486
Storage space cost	0.0167949	0.0839744	0.0671795	0.8		Storage space cost	1.51154	7.55769	6.04615	0.8		Storage space cost	471.6	2358	1886.4	0.8
Total	313.038	360.445	47.4065	0.131522		Total	28173.4	32440	4266.59	0.131522		Total	8.79011e+06	1.01213e+07	1.33118e+06	0.131522
直接成本	312.341	358.337	45.9962	0.12836		直接成本	28110.7	32250.4	4139.66	0.12836		直接成本	8.77054e+06	1.00621e+07	1.29157e+06	0.12836
间接成本	0.697029	2.10731	1.41028	0.669232		间接成本	62.7326	189.658	126.925	0.669232		间接成本	19572.6	59173.2	39600.6	0.669232
50 devices	CDDS service volume per day (person-times)	SPDDS service volume per day (person-times)				50 devices	CDDS service volume per day (person-times)	SPDDS service volume per day (person-times)				50 devices	CDDS service volume per day (person-times)	SPDDS service volume per day (person-times)
daily service volume (person-times)	100	100		Cost savings		daily service volume (person-times)	100	100		Cost savings		daily service volume (person-times)	100	100		Cost savings
Cost Composition	CDDS single treatment cost	SPDDS single treatment cost	CDDS Single Treatment Cost Savings	Reduction		Cost Composition	CDDS cost per day of treatment	SPDDS cost per day of treatment	CDDS Cost Savings per day of treatmen	Reduction		Cost Composition	CDDS Cost per year of treatment	SPDDS Cost per year of treatment	CDDS Cost Savings per year of treatment	Reduction
Labor Cost	18.0489	37.8132	19.7643	0.522683		Labor Cost	1804.89	3781.32	1976.43	0.522683		Labor Cost	563125	1.17977e+06	616646	0.522683
Equipment Cost	58.3157	44.4925	-13.8232	-0.310686		Equipment Cost	5831.57	4449.25	-1382.32	-0.310686		Equipment Cost	1819450	1.38817e+06	-431283	-0.310686
Consumable Cost	235.202	276.032	40.8292	0.147915		Consumable Cost	23520.2	27603.2	4082.92	0.147915		Consumable Cost	7.33832e+06	8.61219e+06	1.27387e+06	0.147915
Learning Cost	0.674926	2.00197	1.32705	0.662869		Learning Cost	67.4926	200.197	132.705	0.662869		Learning Cost	21057.7	62461.5	41403.8	0.662869
Misuse Cost	0.00530849	0.0213609	0.0160525	0.751486		Misuse Cost	0.530849	2.13609	1.60525	0.751486		Misuse Cost	165.625	666.462	500.837	0.751486
Storage space cost	0.0151154	0.0755769	0.0604615	0.8		Storage space cost	1.51154	7.55769	6.04615	0.8		Storage space cost	471.6	2358	1886.4	0.8
Total	312.262	360.436	48.1739	0.133654		Total	31226.2	36043.6	4817.39	0.133654		Total	9.74259e+06	1.12456e+07	1.50302e+06	0.133654

## Sheet: Results graph
Scenario 1	CDDS Single Treatment Cost Savings Reduction																	Scenario 2	CDDS Single Treatment Cost Savings Reduction																			Scenario 3	CDDS Single Treatment Cost Savings Reduction
Cost Composition	5 devices	6 devices	7 devices	8 devices	9 devices	10 devices	11 devices	12 devices	15 devices	20 devices	25 devices	30 devices	35 devices	40 devices	45 devices	50 devices		Cost Composition	4 devices	5 devices	6 devices	7 devices	8 devices	9 devices	10 devices	11 devices	12 devices	15 devices	20 devices	25 devices	30 devices	35 devices	40 devices	45 devices	50 devices			Cost Composition	5 devices	6 devices	7 devices	8 devices	9 devices	10 devices	11 devices	12 devices	15 devices	20 devices	25 devices
Labor Cost	0.5052	0.508438	0.51075	0.512485	0.513834	0.514913	0.515796	0.516532	0.51815	0.519769	0.52074	0.521388	0.52185	0.522197	0.522467	0.522683		Labor Cost	0.508438	0.511675	0.513834	0.515375	0.516532	0.517431	0.51815	0.518739	0.519229	0.520309	0.521388	0.522035	0.522467	0.522775	0.523006	0.523186	0.52333			Labor Cost	0.5052	0.508438	0.51075	0.512485	0.513834	0.514913	0.515796	0.516532	0.51815	0.519769	0.52074
Equipment Cost	-1.29735	-1.05566	-0.883028	-0.753553	-0.65285	-0.572288	-0.506373	-0.451444	-0.3306	-0.209757	-0.137251	-0.0889132	-0.0543864	-0.0284914	-0.00835079	0.00776168		Equipment Cost	-1.65988	-1.29735	-1.05566	-0.883028	-0.753553	-0.65285	-0.572288	-0.506373	-0.451444	-0.3306	-0.209757	-0.137251	-0.0889132	-0.0543864	-0.0284914	-0.00835079	0.00776168			Equipment Cost	-2.03072	-1.7122	-1.48468	-1.31404	-1.18132	-1.07515	-0.988276	-0.915884	-0.756621	-0.597359	-0.501801
Consumable Cost	0.120732	0.13814	0.150574	0.1599	0.167153	0.172956	0.177703	0.18166	0.190364	0.193401	0.199757	0.203994	0.203782	0.206457	0.208537	0.207935		Consumable Cost	0.13814	0.155548	0.167153	0.175443	0.18166	0.186495	0.190364	0.18666	0.18987	0.196932	0.203994	0.205209	0.208537	0.208756	0.210809	0.210727	0.212172			Consumable Cost	0.0541045	0.0728315	0.0862079	0.0962402	0.104043	0.110285	0.115393	0.119649	0.129012	0.13228	0.139117
Learning Cost	0.662869	0.662869	0.662869	0.662869	0.662869	0.662869	0.662869	0.662869	0.662869	0.662869	0.662869	0.662869	0.662869	0.662869	0.662869	0.662869		Learning Cost	0.662869	0.662869	0.662869	0.662869	0.662869	0.662869	0.662869	0.662869	0.662869	0.662869	0.662869	0.662869	0.662869	0.662869	0.662869	0.662869	0.662869			Learning Cost	0.662869	0.662869	0.662869	0.662869	0.662869	0.662869	0.662869	0.662869	0.662869	0.662869	0.662869
Misuse Cost	0.751486	0.751486	0.751486	0.751486	0.751486	0.751486	0.751486	0.751486	0.751486	0.751486	0.751486	0.751486	0.751486	0.751486	0.751486	0.751486		Misuse Cost	0.751486	0.751486	0.751486	0.751486	0.751486	0.751486	0.751486	0.751486	0.751486	0.751486	0.751486	0.751486	0.751486	0.751486	0.751486	0.751486	0.751486			Misuse Cost	0.751486	0.751486	0.751486	0.751486	0.751486	0.751486	0.751486	0.751486	0.751486	0.751486	0.751486
Storage space cost	0.8	0.8	0.8	0.8	0.8	0.8	0.8	0.8	0.8	0.8	0.8	0.8	0.8	0.8	0.8	0.8		Storage space cost	0.8	0.8	0.8	0.8	0.8	0.8	0.8	0.8	0.8	0.8	0.8	0.8	0.8	0.8	0.8	0.8	0.8			Storage space cost	0.8	0.8	0.8	0.8	0.8	0.8	0.8	0.8	0.8	0.8	0.8
Total	-0.0483912	0.000483149	0.0354124	0.0616198	0.0820095	0.0983251	0.111677	0.122805	0.147293	0.167535	0.183086	0.193456	0.198432	0.204292	0.20885	0.210794		Total	-0.00742287	0.0440196	0.0783338	0.102853	0.121248	0.135558	0.147008	0.150954	0.159215	0.177391	0.19557	0.204093	0.211765	0.21554	0.219864	0.221901	0.224724			Total	-0.150551	-0.0969655	-0.0586671	-0.0299308	-0.00757285	0.0103182	0.0249594	0.0371625	0.0640162	0.0862123	0.103268
Scenario 1	CDDS Cost Savings per day of treatmen Reduction																	Scenario 2	CDDS Cost Savings per day of treatmen Reduction																			Scenario 3	CDDS Cost Savings per day of treatmen Reduction
Cost Composition	5 devices	6 devices	7 devices	8 devices	9 devices	10 devices	11 devices	12 devices	15 devices	20 devices	25 devices	30 devices	35 devices	40 devices	45 devices	50 devices		Cost Composition	4 devices	5 devices	6 devices	7 devices	8 devices	9 devices	10 devices	11 devices	12 devices	15 devices	20 devices	25 devices	30 devices	35 devices	40 devices	45 devices	50 devices			Cost Composition	5 devices	6 devices	7 devices	8 devices	9 devices	10 devices	11 devices	12 devices	15 devices	20 devices	25 devices
Labor Cost	0.5052	0.508438	0.51075	0.512485	0.513834	0.514913	0.515796	0.516532	0.51815	0.519769	0.52074	0.521388	0.52185	0.522197	0.522467	0.522683		Labor Cost	0.508438	0.511675	0.513834	0.515375	0.516532	0.517431	0.51815	0.518739	0.519229	0.520309	0.521388	0.522035	0.522467	0.522775	0.523006	0.523186	0.52333			Labor Cost	0.5052	0.508438	0.51075	0.512485	0.513834	0.514913	0.515796	0.516532	0.51815	0.519769	0.52074
Equipment Cost	-1.29735	-1.05566	-0.883028	-0.753553	-0.65285	-0.572288	-0.506373	-0.451444	-0.3306	-0.209757	-0.137251	-0.0889132	-0.0543864	-0.0284914	-0.00835079	0.00776168		Equipment Cost	-1.65988	-1.29735	-1.05566	-0.883028	-0.753553	-0.65285	-0.572288	-0.506373	-0.451444	-0.3306	-0.209757	-0.137251	-0.0889132	-0.0543864	-0.0284914	-0.00835079	0.00776168			Equipment Cost	-2.03072	-1.7122	-1.48468	-1.31404	-1.18132	-1.07515	-0.988276	-0.915884	-0.756621	-0.597359	-0.501801
Consumable Cost	0.120732	0.13814	0.150574	0.1599	0.167153	0.172956	0.177703	0.18166	0.190364	0.193401	0.199757	0.203994	0.203782	0.206457	0.208537	0.207935		Consumable Cost	0.13814	0.155548	0.167153	0.175443	0.18166	0.186495	0.190364	0.18666	0.18987	0.196932	0.203994	0.205209	0.208537	0.208756	0.210809	0.210727	0.212172			Consumable Cost	0.0541045	0.0728315	0.0862079	0.0962402	0.104043	0.110285	0.115393	0.119649	0.129012	0.13228	0.139117
Learning Cost	0.662869	0.662869	0.662869	0.662869	0.662869	0.662869	0.662869	0.662869	0.662869	0.662869	0.662869	0.662869	0.662869	0.662869	0.662869	0.662869		Learning Cost	0.662869	0.662869	0.662869	0.662869	0.662869	0.662869	0.662869	0.662869	0.662869	0.662869	0.662869	0.662869	0.662869	0.662869	0.662869	0.662869	0.662869			Learning Cost	0.662869	0.662869	0.662869	0.662869	0.662869	0.662869	0.662869	0.662869	0.662869	0.662869	0.662869
Misuse Cost	0.751486	0.751486	0.751486	0.751486	0.751486	0.751486	0.751486	0.751486	0.751486	0.751486	0.751486	0.751486	0.751486	0.751486	0.751486	0.751486		Misuse Cost	0.751486	0.751486	0.751486	0.751486	0.751486	0.751486	0.751486	0.751486	0.751486	0.751486	0.751486	0.751486	0.751486	0.751486	0.751486	0.751486	0.751486			Misuse Cost	0.751486	0.751486	0.751486	0.751486	0.751486	0.751486	0.751486	0.751486	0.751486	0.751486	0.751486
Storage space cost	0.8	0.8	0.8	0.8	0.8	0.8	0.8	0.8	0.8	0.8	0.8	0.8	0.8	0.8	0.8	0.8		Storage space cost	0.8	0.8	0.8	0.8	0.8	0.8	0.8	0.8	0.8	0.8	0.8	0.8	0.8	0.8	0.8	0.8	0.8			Storage space cost	0.8	0.8	0.8	0.8	0.8	0.8	0.8	0.8	0.8	0.8	0.8
Total	-0.0483912	0.000483149	0.0354124	0.0616198	0.0820095	0.0983251	0.111677	0.122805	0.147293	0.167535	0.183086	0.193456	0.198432	0.204292	0.20885	0.210794		Total	-0.00742287	0.0440196	0.0783338	0.102853	0.121248	0.135558	0.147008	0.150954	0.159215	0.177391	0.19557	0.204093	0.211765	0.21554	0.219864	0.221901	0.224724			Total	-0.150551	-0.0969655	-0.0586671	-0.0299308	-0.00757285	0.0103182	0.0249594	0.0371625	0.0640162	0.0862123	0.103268
Scenario 1	CDDS Cost Savings per year of treatment Reduction																	Scenario 2	CDDS Cost Savings per year of treatment Reduction																			Scenario 3	CDDS Cost Savings per year of treatment Reduction
Cost Composition	5 devices	6 devices	7 devices	8 devices	9 devices	10 devices	11 devices	12 devices	15 devices	20 devices	25 devices	30 devices	35 devices	40 devices	45 devices	50 devices		Cost Composition	4 devices	5 devices	6 devices	7 devices	8 devices	9 devices	10 devices	11 devices	12 devices	15 devices	20 devices	25 devices	30 devices	35 devices	40 devices	45 devices	50 devices			Cost Composition	5 devices	6 devices	7 devices	8 devices	9 devices	10 devices	11 devices	12 devices	15 devices	20 devices	25 devices
Labor Cost	0.5052	0.508438	0.51075	0.512485	0.513834	0.514913	0.515796	0.516532	0.51815	0.519769	0.52074	0.521388	0.52185	0.522197	0.522467	0.522683		Labor Cost	0.508438	0.511675	0.513834	0.515375	0.516532	0.517431	0.51815	0.518739	0.519229	0.520309	0.521388	0.522035	0.522467	0.522775	0.523006	0.523186	0.52333			Labor Cost	0.5052	0.508438	0.51075	0.512485	0.513834	0.514913	0.515796	0.516532	0.51815	0.519769	0.52074
Equipment Cost	-1.29735	-1.05566	-0.883028	-0.753553	-0.65285	-0.572288	-0.506373	-0.451444	-0.3306	-0.209757	-0.137251	-0.0889132	-0.0543864	-0.0284914	-0.00835079	0.00776168		Equipment Cost	-1.65988	-1.29735	-1.05566	-0.883028	-0.753553	-0.65285	-0.572288	-0.506373	-0.451444	-0.3306	-0.209757	-0.137251	-0.0889132	-0.0543864	-0.0284914	-0.00835079	0.00776168			Equipment Cost	-2.03072	-1.7122	-1.48468	-1.31404	-1.18132	-1.07515	-0.988276	-0.915884	-0.756621	-0.597359	-0.501801
Consumable Cost	0.120732	0.13814	0.150574	0.1599	0.167153	0.172956	0.177703	0.18166	0.190364	0.193401	0.199757	0.203994	0.203782	0.206457	0.208537	0.207935		Consumable Cost	0.13814	0.155548	0.167153	0.175443	0.18166	0.186495	0.190364	0.18666	0.18987	0.196932	0.203994	0.205209	0.208537	0.208756	0.210809	0.210727	0.212172			Consumable Cost	0.0541045	0.0728315	0.0862079	0.0962402	0.104043	0.110285	0.115393	0.119649	0.129012	0.13228	0.139117
Learning Cost	0.662869	0.662869	0.662869	0.662869	0.662869	0.662869	0.662869	0.662869	0.662869	0.662869	0.662869	0.662869	0.662869	0.662869	0.662869	0.662869		Learning Cost	0.662869	0.662869	0.662869	0.662869	0.662869	0.662869	0.662869	0.662869	0.662869	0.662869	0.662869	0.662869	0.662869	0.662869	0.662869	0.662869	0.662869			Learning Cost	0.662869	0.662869	0.662869	0.662869	0.662869	0.662869	0.662869	0.662869	0.662869	0.662869	0.662869
Misuse Cost	0.751486	0.751486	0.751486	0.751486	0.751486	0.751486	0.751486	0.751486	0.751486	0.751486	0.751486	0.751486	0.751486	0.751486	0.751486	0.751486		Misuse Cost	0.751486	0.751486	0.751486	0.751486	0.751486	0.751486	0.751486	0.751486	0.751486	0.751486	0.751486	0.751486	0.751486	0.751486	0.751486	0.751486	0.751486			Misuse Cost	0.751486	0.751486	0.751486	0.751486	0.751486	0.751486	0.751486	0.751486	0.751486	0.751486	0.751486
Storage space cost	0.8	0.8	0.8	0.8	0.8	0.8	0.8	0.8	0.8	0.8	0.8	0.8	0.8	0.8	0.8	0.8		Storage space cost	0.8	0.8	0.8	0.8	0.8	0.8	0.8	0.8	0.8	0.8	0.8	0.8	0.8	0.8	0.8	0.8	0.8			Storage space cost	0.8	0.8	0.8	0.8	0.8	0.8	0.8	0.8	0.8	0.8	0.8
Total	-0.0483912	0.000483149	0.0354124	0.0616198	0.0820095	0.0983251	0.111677	0.122805	0.147293	0.167535	0.183086	0.193456	0.198432	0.204292	0.20885	0.210794		Total	-0.00742287	0.0440196	0.0783338	0.102853	0.121248	0.135558	0.147008	0.150954	0.159215	0.177391	0.19557	0.204093	0.211765	0.21554	0.219864	0.221901	0.224724			Total	-0.150551	-0.0969655	-0.0586671	-0.0299308	-0.00757285	0.0103182	0.0249594	0.0371625	0.0640162	0.0862123	0.103268
Figure 1
CDDS Single Treatment Cost Savings Reduction	5	6	7	8	9	10	11	12	15	20	25	30	35	40	45	50
Scenario 1	-0.0483912	0.000483149	0.0354124	0.0616198	0.0820095	0.0983251	0.111677	0.122805	0.147293	0.167535	0.183086	0.193456	0.198432	0.204292	0.20885	0.210794
Scenario 2	0.0440196	0.0783338	0.102853	0.121248	0.135558	0.147008	0.150954	0.159215	0.177391	0.19557	0.204093	0.211765	0.21554	0.219864	0.221901	0.224724
Scenario 3	-0.150551	-0.0969655	-0.0586671	-0.0299308	-0.00757285	0.0103182	0.0249594	0.0371625	0.0640162	0.0862123	0.103268	0.11464	0.120096	0.126523	0.131522	0.133654
Figure 2
Scenario 1	5	6	7	8	9	10	11	12	15	20	25	30	35	40	45	50
CDDS Single Treatment Cost Savings Reduction	-0.0483912	0.000483149	0.0354124	0.0616198	0.0820095	0.0983251	0.111677	0.122805	0.147293	0.167535	0.183086	0.193456	0.198432	0.204292	0.20885	0.210794
CDDS Single Treatment Cost Savings	-19.1715	0.191352	14.022	24.395	32.4628	38.9171	44.1979	48.5986	58.28	66.2788	72.4242	76.5211	78.486	80.801	82.6015	83.3689
CDDS Cost Savings per day of treatmen	-191.715	2.29623	196.308	390.32	584.331	778.343	972.354	1166.37	1748.4	2651.15	3621.21	4591.27	5494.02	6464.08	7434.13	8336.89
CDDS Cost Savings per year of treatment	-59815.2	716.424	61248.1	121780	182311	242843	303375	363906	545501	827159	1.12982e+06	1.43248e+06	1.71413e+06	2.01679e+06	2.31945e+06	2.60111e+06
Scenario 2	5	6	7	8	9	10	11	12	15	20	25	30	35	40	45	50
CDDS Single Treatment Cost Savings Reduction	0.0440196	0.0783338	0.102853	0.121248	0.135558	0.147008	0.150954	0.159215	0.177391	0.19557	0.204093	0.211765	0.21554	0.219864	0.221901	0.224724
CDDS Single Treatment Cost Savings	16.5681	29.4767	38.6972	45.6125	50.9911	55.2939	56.7748	59.8786	66.7068	73.535	76.7345	79.6154	81.0321	82.6556	83.4197	84.4797
CDDS Cost Savings per day of treatment	248.522	530.581	812.64	1094.7	1376.76	1658.82	1873.57	2155.63	3001.81	4412.1	5755.09	7165.38	8508.37	9918.67	11261.7	12672
CDDS Cost Savings per year of treatment	77538.9	165541	253544	341546	429549	517551	584554	672556	936563	1.37658e+06	1.79559e+06	2.2356e+06	2.65461e+06	3.09462e+06	3.51364e+06	3.95365e+06
Scenario 3	5	6	7	8	9	10	11	12	15	20	25	30	35	40	45	50
CDDS Single Treatment Cost Savings Reduction	-0.150551	-0.0969655	-0.0586671	-0.0299308	-0.00757285	0.0103182	0.0249594	0.0371625	0.0640162	0.0862123	0.103268	0.11464	0.120096	0.126523	0.131522	0.133654
CDDS Single Treatment Cost Savings	-54.3665	-35.0036	-21.173	-10.8	-2.73214	3.72216	9.00295	13.4036	23.0851	31.0838	37.2292	41.3262	43.291	45.606	47.4065	48.1739
CDDS Cost Savings per day of treatmen	-543.665	-420.044	-296.422	-172.8	-49.1785	74.4432	198.065	321.687	692.552	1243.35	1861.46	2479.57	3030.37	3648.48	4266.59	4817.39
CDDS Cost Savings per year of treatment	-169624	-131054	-92483.6	-53913.6	-15343.7	23226.3	61796.2	100366	216076	387926	580776	773626	945475	1.13833e+06	1.33118e+06	1.50302e+06
CDDS Single Treatment Cost Savings	5	6	7	8	9	10	11	12	15	20	25	30	35	40	45	50
Scenario 1	-19.1715	0.191352	14.022	24.395	32.4628	38.9171	44.1979	48.5986	58.28	66.2788	72.4242	76.5211	78.486	80.801	82.6015	83.3689
Scenario 2	16.5681	29.4767	38.6972	45.6125	50.9911	55.2939	56.7748	59.8786	66.7068	73.535	76.7345	79.6154	81.0321	82.6556	83.4197	84.4797
Scenario 3	-54.3665	-35.0036	-21.173	-10.8	-2.73214	3.72216	9.00295	13.4036	23.0851	31.0838	37.2292	41.3262	43.291	45.606	47.4065	48.1739
CDDS Cost Savings per day of treatment	5	6	7	8	9	10	11	12	15	20	25	30	35	40	45	50
Scenario 1	-191.715	2.29623	196.308	390.32	584.331	778.343	972.354	1166.37	1748.4	2651.15	3621.21	4591.27	5494.02	6464.08	7434.13	8336.89
Scenario 2	248.522	530.581	812.64	1094.7	1376.76	1658.82	1873.57	2155.63	3001.81	4412.1	5755.09	7165.38	8508.37	9918.67	11261.7	12672
Scenario 3	-543.665	-420.044	-296.422	-172.8	-49.1785	74.4432	198.065	321.687	692.552	1243.35	1861.46	2479.57	3030.37	3648.48	4266.59	4817.39
CDDS Cost Savings per year of treatment	5	6	7	8	9	10	11	12	15	20	25	30	35	40	45	50
Scenario 1	-59815.2	716.424	61248.1	121780	182311	242843	303375	363906	545501	827159	1.12982e+06	1.43248e+06	1.71413e+06	2.01679e+06	2.31945e+06	2.60111e+06
Scenario 2	77538.9	165541	253544	341546	429549	517551	584554	672556	936563	1.37658e+06	1.79559e+06	2.2356e+06	2.65461e+06	3.09462e+06	3.51364e+06	3.95365e+06
Scenario 3	-169624	-131054	-92483.6	-53913.6	-15343.7	23226.3	61796.2	100366	216076	387926	580776	773626	945475	1.13833e+06	1.33118e+06	1.50302e+06
Figure 3
Scenario 1	CDDS service volume per day (person-times)	SPDDS service volume per day (person-times)				Scenario 1	CDDS service volume per day (person-times)	SPDDS service volume per day (person-times)				Scenario 1	CDDS service volume per day (person-times)	SPDDS service volume per day (person-times)				Scenario 2	CDDS service volume per day (person-times)	SPDDS service volume per day (person-times)				Scenario 2	CDDS service volume per day (person-times)	SPDDS service volume per day (person-times)				Scenario 2	CDDS service volume per day (person-times)	SPDDS service volume per day (person-times)						Scenario 3	CDDS service volume per day (person-times)	SPDDS service volume per day (person-times)				Scenario 3	CDDS service volume per day (person-times)	SPDDS service volume per day (person-times)
50 devices	100	100				50 devices	100	100				50 devices	100	100				50 devices	150	150				50 devices	150	150				50 devices	150	150						50 devices	100	100				50 devices	100	100
Cost Composition	CDDS single treatment cost	SPDDS single treatment cost	CDDS Single Treatment Cost Savings	Reduction	Components of cost savings	Cost Composition	CDDS cost per day of treatment	SPDDS cost per day of treatment	CDDS Cost Savings per day of treatment	Reduction		Cost Composition	CDDS Cost per year of treatment	SPDDS Cost per year of treatment	CDDS Cost Savings per year of treatment	Reduction		Cost Composition	CDDS single treatment cost	SPDDS single treatment cost	CDDS Single Treatment Cost Savings	Reduction	Components of cost savings	Cost Composition	CDDS cost per day of treatment	SPDDS cost per day of treatment	CDDS Cost Savings per day of treatmen	Reduction		Cost Composition	CDDS Cost per year of treatment	SPDDS Cost per year of treatment	CDDS Cost Savings per year of treatment	Reduction				Cost Composition	CDDS single treatment cost	SPDDS single treatment cost	CDDS Single Treatment Cost Savings	Reduction	Components of cost savings	Cost Composition	CDDS cost per day of treatment	SPDDS cost per day of treatment	CDDS Cost Savings per day of treatmen	Reduction
Labor Cost	18.0489	37.8132	19.7643	0.522683	0.23707	Labor Cost	1804.89	3781.32	1976.43	0.522683		Labor Cost	563125	1.17977e+06	616646	0.522683		Labor Cost	18.0244	37.8132	19.7888	0.52333	0.234243	Labor Cost	2703.66	5671.97	2968.32	0.52333		Labor Cost	843542	1.76966e+06	926114	0.52333				Labor Cost	18.0489	37.8132	19.7643	0.522683	0.41027	Labor Cost	1804.89	3781.32	1976.43	0.522683
Equipment Cost	58.1827	58.6378	0.455128	0.00776168	0.00545921	Equipment Cost	5818.27	5863.78	45.5128	0.00776168		Equipment Cost	1815300	1829500	14200	0.00776168		Equipment Cost	38.7885	39.0919	0.303419	0.00776168	0.00359162	Equipment Cost	5818.27	5863.78	45.5128	0.00776168		Equipment Cost	1815300	4	14200	0.00776168				Equipment Cost	58.3157	44.4925	-13.8232	-0.310686	-0.286944	Equipment Cost	5831.57	4449.25	-1382.32	-0.310686
Consumable Cost	235.202	296.948	61.7459	0.207935	0.740635	Consumable Cost	23520.2	29694.8	6174.59	0.207935		Consumable Cost	7.33832e+06	9.26479e+06	1.92647e+06	0.207935		Consumable Cost	233.944	296.948	63.0041	0.212172	0.74579	Consumable Cost	35091.6	44542.3	9450.61	0.212172		Consumable Cost	1.09486e+07	1.38972e+07	2.94859e+06	0.212172				Consumable Cost	235.202	276.032	40.8292	0.147915	0.847538	Consumable Cost	23520.2	27603.2	4082.92	0.147915
Training Cost	0.674926	2.00197	1.32705	0.662869	0.0159178	Training Cost	67.4926	200.197	132.705	0.662869		Training Cost	21057.7	62461.5	41403.8	0.662869		Learning Cost	0.674926	2.00197	1.32705	0.662869	0.0157085	Learning Cost	101.239	300.296	199.057	0.662869		Learning Cost	31586.5	93692.3	62105.8	0.662869				Learning Cost	0.674926	2.00197	1.32705	0.662869	0.027547	Learning Cost	67.4926	200.197	132.705	0.662869
Misoperation Cost	0.00530849	0.0213609	0.0160525	0.751486	0.000192547	Misoperation Cost	0.530849	2.13609	1.60525	0.751486		Misoperation Cost	165.625	666.462	500.837	0.751486		Misuse Cost	0.00530849	0.0213609	0.0160525	0.751486	0.000190016	Misuse Cost	0.796274	3.20414	2.40787	0.751486		Misuse Cost	248.438	999.692	751.255	0.751486				Misuse Cost	0.00530849	0.0213609	0.0160525	0.751486	0.000333219	Misuse Cost	0.530849	2.13609	1.60525	0.751486
Storage space cost	0.0151154	0.0755769	0.0604615	0.8	0.000725229	Storage space cost	1.51154	7.55769	6.04615	0.8		Storage space cost	471.6	2358	1886.4	0.8		Storage space cost	0.0100769	0.0503846	0.0403077	0.8	0.000477129	Storage space cost	1.51154	7.55769	6.04615	0.8		Storage space cost	471.6	2358	1886.4	0.8				Storage space cost	0.0151154	0.0755769	0.0604615	0.8	0.00125507	Storage space cost	1.51154	7.55769	6.04615	0.8
Total	312.129	395.498	83.3689	0.210794	1	Total	31212.9	39549.8	8336.89	0.210794		Total	9.73844e+06	1.23395e+07	2.60111e+06	0.210794		Total	291.447	375.927	84.4797	0.224724	1	Total	43717.1	56389.1	12672	0.224724		Total	1.36397e+07	1.75934e+07	3.95365e+06	0.224724				Total	312.262	360.436	48.1739	0.133654	1	Total	31226.2	36043.6	4817.39	0.133654
[truncated: 5 more columns]

## Sheet:  labor costs
CDDS Cost Calculation Model
Labor inputs
CDDS-Nursing Staff Inputs									SPDDS-Nursing Staff Inputs
Pre-Dialysis									Pre-Dialysis
Number of treatments per day	100								Number of treatments per day	100
Dialysate material preparation									Dialysate material preparation
Single treatment	1.41	mins	Time	1.41	mins	Cost	2.25962	CNY	Single treatment	2.62	mins	Time	2.62	mins	Cost	4.19872	CNY
Treatments per day	141	mins	Time	141	mins	Cost	225.962	CNY	Treatments per day	262	mins	Time	262	mins	Cost	419.872	CNY
Treatments per year	43992	mins	Time	43992	mins	Cost	70500	CNY	Treatments per year	81744	mins	Time	81744	mins	Cost	131000	CNY
self-check of dialysis machine until precharging is complete									self-check of dialysis machine until precharging is complete
Single treatment	1.12	mins	Time	1.12	mins	Cost	1.79487	CNY	Single treatment	3.41	mins	Time	3.41	mins	Cost	5.46474	CNY
Treatments per day	112	mins	Time	112	mins	Cost	179.487	CNY	Treatments per day	341	mins	Time	341	mins	Cost	546.474	CNY
Treatments per year	34944	mins	Time	34944	mins	Cost	56000	CNY	Treatments per year	106392	mins	Time	106392	mins	Cost	170500	CNY
			Time	2.53	mins	Cost	4.05449	CNY				Time	6.03	mins	Cost	9.66346	CNY
			Time	253	mins	Cost	405.449	CNY				Time	603	mins	Cost	966.346	CNY
			Time	78936	mins	Cost	126500	CNY				Time	188136	mins	Cost	301500	CNY
On dialysis									On dialysis
the time of transfer patients' blood to dialysis machine									the time of transfer patients' blood to dialysis machine
Single treatment	1.09	mins	Time	1.09	mins	Cost	1.74679	CNY	Single treatment	2.53	mins	Time	2.53	mins	Cost	4.05449	CNY
Treatments per day	109	mins	Time	109	mins	Cost	174.679	CNY	Treatments per day	253	mins	Time	253	mins	Cost	405.449	CNY
Treatments per year	34008	mins	Time	34008	mins	Cost	54500	CNY	Treatments per year	78936	mins	Time	78936	mins	Cost	126500	CNY
disposal during dialysis									disposal during dialysis
Single treatment	1.32	mins	Time	1.32	mins	Cost	2.11538	CNY	Single treatment	1.74	mins	Time	1.74	mins	Cost	2.78846	CNY
Treatments per day	132	mins	Time	132	mins	Cost	211.538	CNY	Treatments per day	174	mins	Time	174	mins	Cost	278.846	CNY
Treatments per year	41184	mins	Time	41184	mins	Cost	66000	CNY	Treatments per year	54288	mins	Time	54288	mins	Cost	87000	CNY
reinfusion									reinfusion
Single treatment	1.21	mins	Time	1.21	mins	Cost	1.9391	CNY	Single treatment	3.06	mins	Time	3.06	mins	Cost	4.90385	CNY
Treatments per day	121	mins	Time	121	mins	Cost	193.91	CNY	Treatments per day	306	mins	Time	306	mins	Cost	490.385	CNY
Treatments per year	37752	mins	Time	37752	mins	Cost	60500	CNY	Treatments per year	95472	mins	Time	95472	mins	Cost	153000	CNY
Single treatment			Time	3.62	mins	Cost	5.80128	CNY	Single treatment			Time	7.33	mins	Cost	11.7468	CNY
Treatments per day			Time	362	mins	Cost	580.128	CNY	Treatments per day			Time	733	mins	Cost	1174.68	CNY
Treatments per year			Time	112944	mins	Cost	181000	CNY	Treatments per year			Time	133957	mins	Cost	366500	CNY
Post-dialysis									Post-dialysis
drainage									drainage
Single treatment	1.09	mins	Time	1.09	mins	Cost	1.74679	CNY	Single treatment	3.74	mins	Time	3.74	mins	Cost	5.99359	CNY
Treatments per day	109	mins	Time	109	mins	Cost	174.679	CNY	Treatments per day	374	mins	Time	374	mins	Cost	599.359	CNY
Treatments per year	34008	mins	Time	34008	mins	Cost	54500	CNY	Treatments per year	116688	mins	Time	116688	mins	Cost	187000	CNY
waste liquid handling									waste liquid handling
Single treatment	1	mins	Time	1	mins	Cost	1.60256	CNY	Single treatment	1.24	mins	Time	1.24	mins	Cost	1.98718	CNY
Treatments per day	100	mins	Time	100	mins	Cost	160.256	CNY	Treatments per day	124	mins	Time	124	mins	Cost	198.718	CNY
Treatments per year	31200	mins	Time	31200	mins	Cost	50000	CNY	Treatments per year	38688	mins	Time	38688	mins	Cost	62000	CNY
disinfection									disinfection
Single treatment	1.29	mins	Time	1.29	mins	Cost	2.06731	CNY	Single treatment	2.85	mins	Time	2.85	mins	Cost	4.56731	CNY
Treatments per day	129	mins	Time	129	mins	Cost	206.731	CNY	Treatments per day	285	mins	Time	285	mins	Cost	456.731	CNY
Treatments per year	40248	mins	Time	40248	mins	Cost	64500	CNY	Treatments per year	88920	mins	Time	88920	mins	Cost	142500	CNY
Single treatment			Time	3.38	mins	Cost	5.41667	CNY	Single treatment			Time	7.83	mins	Cost	12.5481	CNY
Treatments per day			Time	338	mins	Cost	541.667	CNY	Treatments per day			Time	783	mins	Cost	1254.81	CNY
Treatments per year			Time	105456	mins	Cost	169000	CNY	Treatments per year			Time	244296	mins	Cost	391500	CNY
Single treatment	Nursing Staff		Time	9.53	mins	Cost	15.2724	CNY	Single treatment	Nursing Staff		Time	21.19	mins	Cost	33.9583	CNY
Treatments per day	Nursing Staff		Time	953	mins	Cost	1527.24	CNY	Treatments per day	Nursing Staff		Time	2119	mins	Cost	3395.83	CNY
Treatments per year	Nursing Staff		Time	297336	mins	Cost	476500	CNY	Treatments per year	Nursing Staff		Time	566389	mins	Cost	1059500	CNY
Single treatment	Nursing Staff		saving	11.66	mins				Single treatment	Nursing Staff		saving	18.6859	CNY
Treatments per day	Nursing Staff		saving	1166	mins				Treatments per day	Nursing Staff		saving	1868.59	CNY
Treatments per year	Nursing Staff		saving	269053	mins				Treatments per year	Nursing Staff		saving	583000	CNY
CDDS-Engineer Staff									SPDDS-Engineer Staff
AB powder dissolution									AB Liquid Handling
Single treatment	0.78	mins	Time	0.78	mins	Cost	1.14583	CNY	Single treatment	0	mins	Time	0	mins	Cost	0	CNY
Treatments per day	78	mins	Time	78	mins	Cost	114.583	CNY	Treatments per day	0	mins	Time	0	mins	Cost	0	CNY
Treatments per year	24336	mins	Time	24336	mins	Cost	35750	CNY	Treatments per year	0	mins	Time	0	mins	Cost	0	CNY
equipment maintenance									equipment maintenance
Single treatment	0.38	mins	Time	0.38	mins	Cost	0.558226	CNY	Single treatment	0.45	mins	Time	0.45	mins	Cost	0.661058	CNY
Treatments per day	38	mins	Time	38	mins	Cost	55.8226	CNY	Treatments per day	45	mins	Time	45	mins	Cost	66.1058	CNY
Treatments per year	11856	mins	Time	11856	mins	Cost	17416.7	CNY	Treatments per year	14040	mins	Time	14040	mins	Cost	20625	CNY
equipment malfunction repair									equipment malfunction repair
Single treatment	0.68	mins	Time	0.68	mins	Cost	0.998932	CNY	Single treatment	0.84	mins	Time	0.84	mins	Cost	1.23397	CNY
Treatments per day	68	mins	Time	68	mins	Cost	99.8932	CNY	Treatments per day	84	mins	Time	84	mins	Cost	123.397	CNY
Treatments per year	21216	mins	Time	21216	mins	Cost	31166.7	CNY	Treatments per year	26208	mins	Time	26208	mins	Cost	38500	CNY
addition of disinfectant solution									addition of disinfectant solution
Single treatment	5	mins	Time	5	mins	Cost	7.34509	CNY	Single treatment	1.05	mins	Time	1.05	mins	Cost	1.54247	CNY
Treatments per day	0.05	mins	Time	0.05	mins	Cost	0.0734509	CNY	Treatments per day	105	mins	Time	105	mins	Cost	154.247	CNY
Treatments per year	1560	mins	Time	1560	mins	Cost	2291.67	CNY	Treatments per year	32760	mins	Time	32760	mins	Cost	48125	CNY
Single treatment	Engineer Staff		Time	1.89	mins	Cost	2.77644	CNY	Single treatment	Engineer Staff		Time	2.34	mins	Cost	3.4375	CNY
Treatments per day	Engineer Staff		Time	189	mins	Cost	277.644	CNY	Treatments per day	Engineer Staff		Time	234	mins	Cost	343.75	CNY
Treatments per year	Engineer Staff		Time	58968	mins	Cost	86625	CNY	Treatments per year	Engineer Staff		Time	73008	mins	Cost	107250	CNY
Single treatment	Engineer Staff		saving	0.45	mins				Single treatment	Engineer Staff		saving	0.661058	CNY
Treatments per day	Engineer Staff		saving	45	mins				Treatments per day	Engineer Staff		saving	66.1058	CNY
Treatments per year	Engineer Staff		saving	14040	mins				Treatments per year	Engineer Staff		saving	20625	CNY
CDDS-Worker Staff									SPDDS--Worker Staff
AB Liquid Handling									AB Liquid Handling
Single treatment	0	mins	Time	0	mins	Cost	0	CNY	Single treatment	1.17	mins	Time	1.17	mins	Cost	0.417332	CNY
Treatments per day	0	mins	Time	0	mins	Cost	0	CNY	Treatments per day	117	mins	Time	117	mins	Cost	41.7332	CNY
Treatments per year	0	mins	Time	0	mins	Cost	0	CNY	Treatments per year	36504	mins	Time	36504	mins	Cost	13020.8	CNY
Single treatment	Worker Staff		Time	0	mins	Cost	0	CNY	Single treatment	Worker Staff		Time	1.17	mins	Cost	0.417332	CNY
Treatments per day	Worker Staff		Time	0	mins	Cost	0	CNY	Treatments per day	Worker Staff		Time	117	mins	Cost	41.7332	CNY
Treatments per year	Worker Staff		Time	0	mins	Cost	0	CNY	Treatments per year	Worker Staff		Time	36504	mins	Cost	13020.8	CNY
Single treatment	Worker Staff		saving	1.17	mins				Single treatment	Worker Staff		saving	0.417332	CNY
Treatments per day	Worker Staff		saving	117	mins				Treatments per day	Worker Staff		saving	41.7332	CNY
Treatments per year	Worker Staff		saving	36504	mins				Treatments per year	Worker Staff		saving	13020.8	CNY
Total Labor Costs									Total Labor Costs
Single treatment			Time	11.42	mins	Cost	18.0489	CNY	Single treatment			Time	24.7	mins	Cost	37.8132	CNY
Treatments per day			Time	1142	mins	Cost	1804.89	CNY	Treatments per day			Time	2470	mins	Cost	3781.32	CNY
Treatments per year			Time	356304	mins	Cost	563125	CNY	Treatments per year			Time	675901	mins	Cost	1.17977e+06	CNY
Single treatment	CDDS		saving	13.28	mins				Single treatment	CDDS		saving	19.7643	CNY
Treatments per day	CDDS		saving	1328	mins				Treatments per day	CDDS		saving	1976.43	CNY
Treatments per year	CDDS		saving	319597	mins				Treatments per year	CDDS		saving	616646	CNY

## Sheet: equipment costs
CDDS Cost Calculation Model
CDDS					SPDDS
1. Equipment	Brand	Price(CNY)	Number (units)	Total annual cost (CNY)	1. Equipment	Brand	Price(CNY)	Number (units)	Total annual cost (CNY)	Scenario 1	Scenario 2
Powder dissolution equipment, dialysis fluid supply equipment	JMS	1895000	1	1895000	Hemodialysis equipment	No distinction between brands	196500	50	9825000	196500	150000
Hemodialysis equipment	JMS	190000	50	9500000
		Equipment cost	11395000	CNY			Equipment cost	9825000	CNY
2.Depreciation of equipment	Brand	Depreciable life (years)	Residual value rate (%)	Total annual cost (CNY)	2.Depreciation of equipment	Brand	Depreciable life (years)	Residual value rate (%)	Total annual cost (CNY)	reference
Powder dissolution equipment, dialysis fluid supply equipment	JMS	7	0.02	265300	Hemodialysis equipment	No distinction between brands	7	0.02	1375500	[1]杨晓雁.设备折旧计算方法[J].信息技术,2011,35(07):189-191.DOI:10.13274/j.cnki.hdzj.2011.07.013.
Hemodialysis equipment	JMS	7	0.02	1330000
	Annual treatment depreciation of equipment cost		1595300	CNY		Annual treatment depreciation of equipment cost		1375500	CNY
	Daily treatment depreciation of equipment cost		5113.14	CNY		Daily treatment depreciation of equipment cost		4408.65	CNY
	Single treatment depreciation of equipment cost		51.1314	CNY		Single treatment depreciation of equipment cost		44.0865	CNY
						CDDS annual treatment depreciation of equipment cost savings		-219800	CNY
						CDDS daily treatment depreciation of equipment cost savings		-704.487	CNY
						CDDS single treatment depreciation of equipment savings		-7.04487	CNY
3. Equipment maintenance	Brand	Annual equipment maintenance cost per unit (CNY)	Annual equipment maintenance cost (CNY)		3. Equipment maintenance	Brand	Annual equipment maintenance cost per unit (CNY)	Annual equipment maintenance cost (CNY)			CDDS	SPDDS
Powder dissolution equipment, dialysis fluid supply equipment, Hemodialysis equipment	JMS	4400	220000		Hemodialysis equipment	No distinction between brands	9080	454000		Scenario 1	4400	9080
										Scenario 2	4483	6763.33
	Annual treatment equipment maintenance cost		220000	CNY		Annual treatment equipment maintenance cost		454000	CNY
	Daily treatment equipment maintenance cost		705.128	CNY		Daily treatment equipment maintenance cost		1455.13	CNY
	Single treatment equipment maintenance cost		7.05128	CNY		Single treatment equipment maintenance cost		14.5513	CNY
						CDDS annual treatment equipment maintenance cost savings		234000	CNY
						CDDS daily treatment equipment maintenance cost savings		750	CNY
						CDDS single treatment equipment maintenance cost savings		7.5	CNY
	Single treatment equipment and maintenance cost		58.1827	CNY		Single treatment equipment and maintenance cost		58.6378	CNY
	Daily treatment equipment and maintenance costs		5818.27	CNY		Daily treatment equipment and maintenance costs		5863.78	CNY
	Annual treatment equipment and maintenance cost		1815300	CNY		Annual treatment equipment and maintenance cost		1829500	CNY
						CDDS single treatment equipment and maintenance cost savings		0.455128	CNY
						CDDS daily treatment equipment and maintenance cost savings		45.5128	CNY
						CDDS annual treatment equipment and maintenance cost savings		14200	CNY

## Sheet: consumable costs
CDDS Cost Calculation Model
consumable costs
CDDS						SPDDS
Pre-Dialysis						Pre-Dialysis						Scenario 1&2	Scenario 3
Tubing-single treatment	1	unit	Cost	29.3333	CNY	Tubing-single treatment	1	unit	Cost	48.6667	CNY	48.6667	27.75
Tubing-daily treatment	100	unit	Cost	2933.33	CNY	Tubing-daily treatment	100	unit	Cost	4866.67	CNY
Tubing-annual treatment	31200	unit	Cost	915200	CNY	Tubing-annual treatment	31200	unit	Cost	1518400	CNY
Heparin-single treatment	1	unit	Cost	10.38	CNY	Heparin-single treatment	1	unit	Cost	10.38	CNY
Heparin-daily treatment	100	unit	Cost	1038	CNY	Heparin-daily treatment	100	unit	Cost	1038	CNY
Heparin-annual treatment	31200	unit	Cost	323856	CNY	Heparin-annual treatment	31200	unit	Cost	323856	CNY
A powder-single treatment	1	unit	Cost	35.2222	CNY	A liquid-single treatment	1	unit	Cost	42.6667	CNY
A powder-daily treatment	100	unit	Cost	3522.22	CNY	A liquid-daily treatment	100	unit	Cost	4266.67	CNY
A powder-annual treatment	31200	unit	Cost	1.09893e+06	CNY	A liquid-annual treatment	31200	unit	Cost	1331200	CNY
B powder-single treatment	1	unit	Cost	35.2222	CNY	B liquid-single treatment	1	unit	Cost	32	CNY
B powder-daily treatment	100	unit	Cost	3522.22	CNY	B liquid-daily treatment	100	unit	Cost	3200	CNY
B powder-annual treatment	31200	unit	Cost	1.09893e+06	CNY	B liquid-annual treatment	31200	unit	Cost	998400	CNY
Saline solution-single treatment	0	L	Cost	0	CNY	Saline solution-single treatment	1	L	Cost	12.27	CNY
Saline solution-daily treatment	0	L	Cost	0	CNY	Saline solution-daily treatment	100	L	Cost	1227	CNY
Saline solution-annual treatment	0	L	Cost	0	CNY	Saline solution-annual treatment	31200	L	Cost	382824	CNY
Dialyzer-single treatment	1	unit	Cost	111.911	CNY	Dialyzer-single treatment	1	unit	Cost	111.911	CNY
Dialyzer-daily treatment	100	unit	Cost	11191.1	CNY	Dialyzer-daily treatment	100	unit	Cost	11191.1	CNY
Dialyzer-annual treatment	31200	unit	Cost	3.49163e+06	CNY	Dialyzer-annual treatment	31200	unit	Cost	3.49163e+06	CNY
Waste liquid bag-single treatment	0	unit	Cost	0	CNY	Waste liquid bag-single treatment	1	unit	Cost	0	CNY
Waste liquid bag-daily treatment	0	unit	Cost	0	CNY	Waste liquid bag-daily treatment	100	unit	Cost	0	CNY
Waste liquid bag-annual treatment	0	unit	Cost	0	CNY	Waste liquid bag-annual treatment	31200	unit	Cost	0	CNY
	Single treatment consumables cost		Cost	222.069	CNY		Single treatment consumables cost		Cost	257.894	CNY
	Daily treatment consumables cost		Cost	22206.9	CNY		Daily treatment consumables cost		Cost	25789.4	CNY
	Annual treatment consumables cost		Cost	6.92855e+06	CNY		Annual treatment consumables cost		Cost	8.04631e+06	CNY
On-Dialysis						On-Dialysis
Saline solution-single treatment	0	L	Cost	0	CNY	Saline solution-single treatment	1	L	Cost	12.27	CNY		0.5
Saline solution-daily treatment	0	L	Cost	0	CNY	Saline solution-daily treatment	100	L	Cost	1227	CNY
Saline solution-annual treatment	0	L	Cost	0	CNY	Saline solution-annual treatment	31200	L	Cost	382824	CNY
	Single treatment consumables cost		Cost	0	CNY		Single treatment consumables cost		Cost	12.27	CNY
	Daily treatment consumables cost		Cost	0	CNY		Daily treatment consumables cost		Cost	1227	CNY
	Annual treatment consumables cost		Cost	0	CNY		Annual treatment consumables cost		Cost	382824	CNY
Post-Dialysis						Post-Dialysis
Peracetic acid disinfectant-daily treatment	1.92	L	Cost	122.88	CNY	Citric acid disinfectant-single treatment	0.13	L	Cost	7.75667	CNY	3L per day per unit
Peracetic acid disinfectant-annual treatment	599.04	L	Cost	38338.6	CNY	Citric acid disinfectant-annual treatment	13	L	Cost	775.667	CNY
Peracetic acid disinfectant-single treatment	0.0192	L	Cost	1.2288	CNY	Citric acid disinfectant-single treatment	4056	L	Cost	242008	CNY
Sodium hypochlorite disinfectant-daily treatment	4.17	L	Cost	52.6588	CNY	Sodium hypochlorite disinfectant-single treatment	0.16	L	Cost	2.02048	CNY	4-5L per day per unit
Sodium hypochlorite disinfectant-annual treatment	1301.04	L	Cost	16429.5	CNY	Sodium hypochlorite disinfectant-daily treatment	16	L	Cost	202.048	CNY
Sodium hypochlorite disinfectant-single treatment	0.0417	L	Cost	0.526588	CNY	Sodium hypochlorite disinfectant-annual treatment	4992	L	Cost	63039	CNY
	Single treatment consumables cost		Cost	1.75539	CNY		Single treatment consumables cost		Cost	9.77715	CNY
	Daily treatment consumables cost		Cost	175.539	CNY		Daily treatment consumables cost		Cost	977.715	CNY
	Annual treatment consumables cost		Cost	54768.1	CNY		Annual treatment consumables cost		Cost	305047	CNY
other consumable costs						other consumable costs
ETRF JP80-annual treatment	100	unit	Cost	250000	CNY	Dialysate filter-annual treatment	400	unit	Cost	530611	CNY	JP80=Number of equipment*2	SPDDSDialysate Filter=Number of equipment*8
ETRF JP80-daily treatment	0.320513	unit	Cost	801.282	CNY	Dialysate filter-daily treatment	1.28205	unit	Cost	1700.68	CNY
ETRF JP80-single treatment	0.00320513	unit	Cost	8.01282	CNY	Dialysate filter-single treatment	0.0128205	unit	Cost	17.0068	CNY
C40A-annual treatment	5	unit	Cost	105000	CNY	other consumable -annual treatment	0	unit	Cost	0	CNY	C40A=1 unit+1 unit per 15 equipment
C40A-daily treatment	0.0160256	unit	Cost	336.538	CNY	other consumable -daily treatment	0	unit	Cost	0	CNY
C40A-single treatment	0.000160256	unit	Cost	3.36538	CNY	other consumable -single treatment	0	unit	Cost	0	CNY
	Single treatment consumables cost		Cost	11.3782	CNY		Single treatment consumables cost		Cost	17.0068	CNY
	Daily treatment consumables cost		Cost	1137.82	CNY		Daily treatment consumables cost		Cost	1700.68	CNY
	Annual treatment consumables cost		Cost	355000	CNY		Annual treatment consumables cost		Cost	530611	CNY
Total consumable costs						Total consumable costs
	Single treatment consumables cost			235.202	CNY		Single treatment consumables cost		Cost	296.948	CNY
	Daily treatment consumables cost			23520.2	CNY		Daily treatment consumables cost		Cost	29694.8	CNY
	Annual treatment consumables cost			7.33832e+06	CNY		Annual treatment consumables cost		Cost	9.26479e+06	CNY
Total consumable costs
							CDDS single treatment consumables cost savings			61.7459	CNY
							CDDS daily treatment consumables cost savings			6174.59	CNY
							CDDS annual treatment consumables cost savings			1.92647e+06	CNY

## Sheet: indirect costs
CDDS Cost Calculation Model
Equipment learning costs
CDDS-Nursing Staff Inputs						SPDDS-Nursing Staff Inputs
Learning hours	4.38	day	cost	21057.7	CNY	Learning hours	8.12	day	cost	62461.5	CNY
Daily treatment learning hours	0.0140385	day	cost	67.4926	CNY	Daily treatment learning hours	0.0260256	day	cost	200.197	CNY
Annual treatment learning hours	0.000140385	day	cost	0.674926	CNY	Annual treatment learning hours	0.000260256	day	cost	2.00197	CNY
						CDDS annual treatment equipment learning cost savings				41403.8	CNY
						CDDS daily treatment equipment learning cost savings				132.705	CNY
						CDDS single treatment equipment learning cost savings				1.32705	CNY
Equipment misoperation costs
Number of misoperations per month	0.65	times/month				Number of misoperations per month	0.76	times/month
Treatment time delayed per misoperation	2.12	mins/time				Treatment time delayed per misoperation	4.56	mins/time
Treatment time delayed per year misoperation	103.35	mins/year	cost	165.625	CNY	Treatment time delayed per year misoperation	415.872	mins/year	cost	666.462	CNY
Treatment time delayed per day misoperation	0.33125	mins/day	cost	0.530849	CNY	Treatment time delayed per day misoperation	1.33292	mins/day	cost	2.13609	CNY
Treatment time delayed for single treatment misoperation	0.0033125	mins/visit	cost	0.00530849	CNY	Treatment time delayed for single treatment misoperation	0.0133292	mins/visit	cost	0.0213609	CNY
						CDDS annual treatment equipment misoperation cost savings				500.837	CNY
						CDDS daily treatment equipment misoperation cost savings				1.60525	CNY
						CDDS single treatment equipment misoperation cost savings				0.0160525	CNY
Equipment placement space costs												reference
Annual treatment storage area	2	m2	cost	471.6	CNY	Annual treatment storage area	10	m2	cost	2358	CNY	上海市城乡建设用地基准地价：公共管理与公共服务用地一类1级，11790元/平方米；使用年限50年
Share of daily treatment storage area	0.00641026	m2	cost	1.51154	CNY	Share of daily treatment storage area	0.0320513	m2	cost	7.55769	CNY	https://hd.ghzyj.sh.gov.cn/tdgl/jzdjgxcg/201412/t20141222_643382.html
Share of single treatment storage area	6.41026e-05	m2	cost	0.0151154	CNY	Share of single treatment storage area	0.000320513	m2	cost	0.0755769	CNY
						CDDS annual treatment equipment placement space cost savings				1886.4	CNY
						CDDS daily treatment equipment placement space cost savings				6.04615	CNY
						CDDS single treatment equipment placement space cost savings				0.0604615	CNY
Indirect costs
Annual treatment indirect cost			cost	21694.9	CNY	Annual treatment indirect cost			cost	65486	CNY
Daily treatment indirect cost			cost	69.535	CNY	Daily treatment indirect cost			cost	209.891	CNY
Single treatment indirect cost			cost	0.69535	CNY	Single treatment indirect cost			cost	2.09891	CNY
						CDDS annual treatment indirect cost savings			cost	43791.1	CNY
						CDDS daily treatment indirect cost savings			cost	140.356	CNY
						CDDS single treatment indirect cost savings			cost	1.40356	CNY

## Sheet: Remuneration scales for staff
Remuneration scales for various categories of personnel
	Total annual remuneration (CNY)	Number of weeks worked per year (weeks)	Number of days worked per week (days)	Hours worked per day (hours)	Hours worked per year (minutes)	Pay per unit of time (CNY/min)	Average pay (CNY/min)	Average pay (CNY/year)	Source
nurse consultant, Nephrology	280000	52	6	8	149760	1.86966	1.60256	240000	Hospital Research
vice nurse consultant	260000	52	6	8	149760	1.73611			Hospital Research
chief nurse, Nephrology	240000	52	6	8	149760	1.60256			Hospital Research
senior nurse, Nephrology	220000	52	6	8	149760	1.46902			Hospital Research
junior nurse, Nephrology	200000	52	6	8	149760	1.33547			Hospital Research
Senior Engineer, Hemodialysis Laboratory	260000	52	6	8	149760	1.73611	1.46902	220000	Hospital Research
Deputy Senior Engineer, Hemodialysis Laboratory	240000	52	6	8	149760	1.60256			Hospital Research
Engineer, Hemodialysis Laboratory	220000	52	6	8	149760	1.46902			Hospital Research
Assistant Engineer, Hemodialysis Laboratory	200000	52	6	8	149760	1.33547			Hospital Research
Technician, Hemodialysis Laboratory	180000	52	6	8	149760	1.20192			Hospital Research
Other Personnel - Porter	53418.5	52	6	8	149760	0.356694	0.356694	53418.5	China Statistical Yearbook 2022, corrected with hospital research

## Sheet: Unit price of consumables
			Hospital Procurement Data-1								Hospital Procurement Data-2								Hospital Procurement Data-3								Yaozhi Devices Winning Bid Data
Consumable	Mean（CNY）		Consumable	Name	Specification	Brand	Unit price (CNY)	Mean（CNY）			Consumable	Name	Specification	Brand	Unit price (CNY)	Mean（CNY）			Consumable	Name	Specification	Brand	Unit price (CNY)	Mean（CNY）			Name	Unit price (CNY)	Price Year
Tubing（SPDDS&CDDS）	39		SPDDS Tubing	血液净化装置的体外循环血路	JRHLL-020	威高/贝朗	33	50.5			SPDDS Tubing	血液净化装置的体外循环血路	BAIN-BL006	贝朗	25	22.5			SPDDS Tubing	血液净化体外循环血路	AV-SetONLINEplus5008-R	费森	73	73			Tubing	48.99	2023
SPDDS Tubing(no distinction between single and double pumps)	48.6667			血液净化体外循环血路	AV-SetONLINEplus5008-R	费森	68					血液净化体外循环血路	JRHLL-020 34A	威高	20
SPDDS Tubing(single pumps)	27.75
CDDS Tubing	29.3333		CDDS Tubing	血液净化装置的体外循环血路	is01-018-00-01	JMS	30	30			CDDS Tubing	血液净化装置的体外循环血路	is01-018-00-01	JMS	26	26			CDDS Tubing	血液净化装置的体外循环血路	is01-018-00-01	JMS	32	32
Heparin	10.38		Heparin	普通肝素	12500U/支		10.38	10.38			Heparin	普通肝素	12500U/支						Heparin	普通肝素	12500U/支		/				Heparin	7	2022
AB powder	35.2222		AB powder	血液透析粉	A+B粉（/人）	普瑞森	38	38.6667			AB powder	血液透析粉	A+B粉（/人）	紫京城	40	40			AB powder	血液透析粉	A+B粉（/人）	普瑞森	36	27			A powder	73.23	2022
				透析用干粉（费森专用）	650g	费森	43													透析用碳酸氢钠干粉	650g	普瑞森	18				B powder	42.4	2022
				透析用碳酸氢钠干粉	650g	普瑞森	35
A liquid	42.6667		A liquid	血液透析浓缩液	AH01-II 35X (A液 装量:5L A01-1.75)	常州华岳	40	40			A liquid	血液透析浓缩液	AH01-II 35X (A液 装量:5L A02-1.5)	常州华岳	60	65			A liquid	血液透析浓缩液	10L/2人份		46	23			A liquid	51.98	2022
				血液透析浓缩液	AH01-II 35X (A液 装量:5L A02-1.5)	常州华岳	40					血液透析浓缩液	AH01-II 35X(A液 装量：5L A03-1.25)	常州华岳	60												Hemodialysis Concentrate	48.13	2022
				血液透析浓缩液	AH01-II 35X(A液 装量：5L A03-1.25)	常州华岳	40					血液透析浓缩液	AH01-II 35X (A液 装量:5L A02-1.5)	百特	70
												血液透析浓缩液	AH01-II 35X(A液 装量：5L A03-1.25)	百特	70												B liquid	47.6	2022
B liquid	32		B liquid	血液透析浓缩液	AH01-II 35X（B液 装量：6.3L）	常州华岳	30	30			B liquid	血液透析浓缩液	AH01-II 35X（B液 装量：6.3L）	常州华岳	20	34			B liquid	血液透析浓缩液			/				Physiological sodium chloride solution for dialysis flushing	24	2022
					B粉		费森43 普瑞森35					血液透析浓缩液	AH01-II 35X（B液 装量：6.3L）	百特	48
Saline solution	12.27		Saline solution	盐水	500ml	百特	12	16.55	0.024		Saline solution	盐水	500ml	百特	3	7.99	0.006		Saline solution	盐水	500ml	百特	/				Dialyzer	152.59	2023
				盐水	1000ml	百特	9.1		0.0091			盐水	1000ml	百特	9.98		0.00998			盐水	1000ml	百特	/				Waste liquid bag	25.38	2022
Dialyzer(no distinction between single and double pumps)	111.911		Dialyzer	空心纤维透析器	F16	威高	88	109.333			Dialyzer	空心纤维透析器	F15	威高	86	91.4			Dialyzer	空心纤维透析器	HF18	威高	100	135
				空心纤维透析器	HF15	威高	110					空心纤维透析器	HF15	威高	92					空心纤维血液透析滤过器	FX80	费森	170
				空心纤维透析器	HF18	威高	110					空心纤维透析器	Fx-8	费森	92
				空心纤维透析器	SUREFLUX-130G	尼普洛	116					空心纤维透析器	FB-15U	尼普洛	95
				空心纤维透析器	SUREFLUX-150G	尼普洛	116					空心纤维血液透析器	Pro-16	贝朗	92												Peracetic acid disinfectant	508.49	2022
				空心纤维血液透析器	B-16H	德朗	116																				Sodium hypochlorite disinfectant	138.9	2022
Peracetic acid disinfectant	64		Peracetic acid disinfectant	瑞若灵4.5过氧乙酸消毒液	5	瑞诺灵	320	64			Peracetic acid disinfectant	瑞若灵4.5过氧乙酸消毒液	5L	瑞诺灵	320	320	64		Peracetic acid disinfectant	瑞若灵4.5过氧乙酸消毒液	5	瑞诺灵	320	320	64		Citric acid disinfectant	493.7	2023
Sodium hypochlorite disinfectant	12.628		Sodium hypochlorite disinfectant	朗索5%次氯酸钠消毒液	液体 2.5kg	朗索	32	12.8			Sodium hypochlorite disinfectant	朗索5%次氯酸钠消毒液	液体 2.5kg	朗索	30.71	30.71	12.284		Sodium hypochlorite disinfectant	朗索5%次氯酸钠消毒液	液体 2.5kg	朗索	32	32	12.8
Citric acid disinfectant	59.6667		Citric acid disinfectant	柠檬酸消毒液	6L	贝朗	360	60	69.3333		Citric acid disinfectant	柠檬酸消毒液	6L	贝朗	/				Citric acid disinfectant	柠檬酸消毒液	6L	贝朗			50
				柠檬酸消毒液	5L	费森	320	64				柠檬酸消毒液	5L	费森	/					柠檬酸消毒液	5L	费森	250	50			Dialysate filter-SPDDS	1219.45	2023
				柠檬酸消毒液	5L	日机装	420	84				柠檬酸消毒液	5L	日机装	/					柠檬酸消毒液	5L	日机装					Dialysate filter-SPDDS	1801.28	2022
Dialysate filter-SPDDS	1326.53		Dialysate filter	透析液过滤器-SPDDS	Ultra	贝朗	1600	1433.33			Dialysate filter	透析液过滤器-SPDDS	Ultra	贝朗	2400	1346.25			Dialysate filter	透析液过滤器-SPDDS		费森	1200	1200			Dialysate filter-CDDS （small）	1200
				透析液过滤器-SPDDS	EF-02	日机装	1300					透析液过滤器-SPDDS	EF-02	日机装	990												Dialysate filter-CDDS （big）	20000
				透析液过滤器-SPDDS		费森	1400					透析液过滤器-SPDDS	DF-210	宝莱特	1000
												透析液过滤器-SPDDS	Diasafe plus		995
Dialysate filter-CDDS(JP-80)	2500			透析液过滤器-CDDS	JP-80	JMS	3000	3000				透析液过滤器-CDDS	JP-80	JMS						透析液过滤器-CDDS	JP-80	JMS	2000	2000
Dialysate filter-CDDS(C40A)	21000			透析液过滤器-CDDS	C40A	JMS	22000	22000				透析液过滤器-CDDS	C40A	JMS						透析液过滤器-CDDS	C40A	JMS	20000	20000
Waste liquid bag	0		Waste liquid bag					0			Waste liquid bag					0			Waste liquid bag					0
											备注：嘉中心								备注：仁济宝山
other consumable			other consumable	一次性使用血液灌流器	HA130	健帆	599				单机:管路20－25+透析器86或92；								SPDDS仅做HDF，耗材单价为HDF耗材
				一次性使用血液净化滤器	L	贝朗	844				JMS:管路26+管路92或95
				空心纤维血液透析滤过器	FX80 (CN0218)	费森	205
				一次性钝型动静脉瘘穿刺针	16G×1	尼普洛	12
				一次性使用动静脉瘘穿刺针	70232660	贝朗	9
				一次性使用留置针	SP502-17(33)	美德	30.5
				一次性使用留置针	SP502-18(33)	美德	30.5
Remarks: Dialyzers and treatment modality related

## Sheet: Questionnaire Chief of Nephrol 
Cost Input Questionnaire for CDDS
Hospital 1					Hospital 2					Hospital 3
1. Staffing of the Department					1. Staffing of the Department					1. Staffing of the Department
Number of doctors	4	person			Number of doctors	1	person			Number of doctors	3	person
Number of nurses	23	person			Number of nurses	14	person			Number of nurses	16	person
Number of engineers	1	person			Number of engineers	1	person			Number of engineers	1	person
Number of laborers	11	person			Number of laborers	1	person			Number of laborers	3	person
2. Configuration of beds in the department					2. Configuration of beds in the department					2. Configuration of beds in the department
Number of beds	65	beds			Number of beds	46	beds			Number of beds	60	beds
Number of CDDS beds	30	beds			Number of CDDS beds	25	beds			Number of CDDS beds	24	beds
Number of beds in single machine	35	beds			Number of beds in single machine	21	beds			Number of beds in single machine	36	beds
3. Equipment Configuration					3. Equipment Configuration					3. Equipment Configuration
Number of CDDS dialysis units	30	units			Number of CDDS dialysis units	30	units			Number of CDDS dialysis units	24	units
Number of SPDDS machines	40	units			Number of SPDDS machines	29	units			Number of SPDDS machines	36	units
4. Volume of services provided by the department					4. Volume of services provided by the department					4. Volume of services provided by the department
Number of working weeks per year	52	weeks			Number of working weeks per year	52	weeks			Number of working weeks per year	52	weeks
Number of working days per week	6	days			Number of working days per week	3	days			Number of working days per week	6	days
Number of shifts per day	2	shifts			Number of shifts per day	2	shifts			Number of shifts per day	2	shifts
Number of hours per shift	6	hours			Number of hours per shift	6	hours			Number of hours per shift	5.5	hours
Number of CDDS dialysis patients per shift	30	person			Number of CDDS dialysis patients per shift	25	person			Number of CDDS dialysis patients per shift	24	person
Number of patients on single machine dialysis per shift	35	person			Number of patients on single machine dialysis per shift	20	person			Number of patients on single machine dialysis per shift	36	person
CDDS average	26.3333	person
SPDDS average	30.3333	person
